# Supplementary material for: Endonuclease G preferentially cleaves 5-hydroxymethylcytosine-modified DNA creating a substrate for recombination
Source: PubMed Central journal article supplement (PMC4245937; doi:10.1093/nar/gku1032), 2014-10-29
Supplement: supp_gku1032_nar-02470-f-2014-File008.pdf [file supp_gku1032_nar-02470-f-2014-File008.pdf]

## Supporting Material

### Supplemental Figure Legends

**Supplemental Figure S1. Liver nuclear extracts are not contaminated with detectable levels of mitochondrial proteins.** An increasing titration of 25, 50 or 100  $\mu$ g of whole liver extract or liver nuclear extracts were resolved on SDS-PAGE followed by Western blotting. Blots were probed with antibodies directed against Mitochondrial Complex IV, Endonuclease G or histone H3.

**Supplemental Figure S2. Loading control and activity assay of *Endog*<sup>+/+</sup> and *Endog*<sup>-/-</sup> LiNE.** 5  $\mu$ g of LiNE derived from *Endog*<sup>+/+</sup> or *Endog*<sup>-/-</sup> were resolved on 12% SDS-PAGE followed by Western blotting. Blots were probed with anti  $\alpha$ -Actin Antiserum (A). Quantification of ATP hydrolysis activity assay of *Endog*<sup>+/+</sup> and *Endog*<sup>-/-</sup> LiNE, showing that both extracts are equally active (B).

**Supplemental Figure S3. An activity from liver nuclear extracts preferentially cleaves 5hmC-modified DNA.** 4.5 ng of either unmodified or fully 5hmC-modified 2.7 kbp substrates DNA were incubated with increasing amounts of liver nuclear extracts ranging from 25 ng to 100 ng.

**Supplemental Figure S4. Heparin agarose chromatography.** The nuclear extracts from 54 mice were processed and applied to a heparin agarose column. Fractions were assayed for their ability to cleave cytosine and 5-hydroxymethylcytosine containing DNA. Fractions containing the greatest amount of cleavage activity (fractions eluting between 50 and 120 mM KCl) were pooled and subjected to further purification (see also Figure 2B and Supplemental Figures S5, S6 and S7). Abbreviations: load (L) and flow-through (FT).

**Supplemental Figure S5. Anion exchange chromatography.** The heparin agarose pool from Supplemental Figure S4 was applied to a HiTrap Q column. Fractions were assayed for their ability to cleave cytosine and 5-hydroxymethylcytosine containing DNA. Fractions containing the greatest amount of cleavage activity (fractions eluting between 50 and 100 mM KCl) were pooled and subjected to further purification (See also Figure 2B and Supplemental Figures S4, S6 and S7). Abbreviations: load (L) and flow-through (FT).

**Supplemental Figure S6. Cation exchange chromatography.** The HiTrap Q pool from Supplemental figure S5 was applied to a HiTrap SP column. Fractions were assayed for their ability to cleave cytosine and 5-hydroxymethylcytosine containing DNA. Fractions containing the greatest amount of cleavage activity (fractions eluting between 60 and 80 mM KCl) were pooled and subjected to further purification (see also Figure 2B and Supplemental Figures S4, S5 and S7). Abbreviations: load (L) and flow-through (FT).

**Supplemental Figure S7. Size exclusion chromatography.** The HiTrap SP pool from Supplemental figure S6 was applied to a Superdex 75 column. Fractions were assayed for their ability to cleave cytosine and 5-hydroxymethylcytosine containing DNA. Fractions containing the greatest amount of cleavage activity (fractions eluting at the apparent molecular weight between 80 and 100 kDa) were pooled and subjected to further purification (see also Figure 2B and Supplemental Figures S4, S5 and S6). Abbreviations: load (L) and flow-through (FT).

**Supplemental Figure S8. Identification of endonuclease G using nanoLC-ESI-MS/MS.** The full length primary sequence of Endonuclease G is shown. Red indicates peptides identified using LC-MS/MS that map uniquely to the Endonuclease G primary sequence.

**Supplemental Figure S9. Partial purifications of EndoG and EndoG/H128A.** 6xhis tagged recombinant EndoG and EndoG/H128A were resolved on SDS-PAGE and either Coomassie stained or Western blotted and probed with 6xHis antiserum. 3 µg load for Coomassie staining 500 ng load for Western Analysis.

**Supplemental Figure S10. Endonuclease G preferentially catalyzes the cleavage of 5-hydroxymethylcytosine containing DNA.** Cytosine and 5-hydroxymethylcytosine containing substrates were incubated with 10 ng liver nuclear extracts or a titration from 0.4 to 12.9 nM of recombinant Endonuclease G.

**Supplemental Figure S11. Endonuclease G does not bind preferentially to 5hmC-modified DNA.** 4.5 ng (53.3 fmol DNA molecules) each short (130 bp) cytosine, fully 5-methylcytosine (5meC) and fully 5hmC substrates (5hmC), <sup>32</sup>P labelled at both ends, were incubated in the presence of 5 mM EDTA at 4°C with an increasing titration (0.33 µM to 1.3 µM) of recombinant Endonuclease G. Reactions were resolved on 6% Native-PAGE.

**Supplemental Figure S12. Schematic of the 130 bp substrate.** The region suspected to be cleaved from the initial substrate by the liver nuclear extract was cloned into pCR 2.1 Topo. This region was then amplified such that a 130 bp fragment was created with either all cytosine, all 5meC residues or all 5hmC residues. This amplicon was also used to measure cleavage activity in HeLa cells (Schematic Figure 4A and assay shown Figure 4B).

**Supplemental Figure S13. Endonuclease G cleaves 5'-GGGGCCAG-3' sequences leaving a 5'-overhang.** Oligonucleotide products from *Hae*III or EndoG digestion were resolved using 20% denaturing PAGE. Reactions with 5hmC modified oligonucleotides at positions 5 and 6 (Figure 3B) yield two primary products when incubated with EndoG – 27 and 14 bases (Lanes 2 and 3). *Hae*III digestion of the same substrates results in a blunt cut at

the 5'-GGCC-3' sequence resulting in a 29 base fragment and a 16 base fragment (Lane 4). These products suggest that EndoG cleaves the substrate producing a 5'-GGCC overhang.

**Supplemental Figure S14. Endonuclease G knockdown over time.** HeLa Cells were transfected with control siRNA or EndoG siRNA 1 at a concentration of 30 nM. Knockdown was calculated as percent EndoG RNA remaining compared to untreated HeLa cells.

**Supplemental Figure S15. Properties of stably transfected HeLa cell lines.** Expression of Tet2 CD and EndoG (A), Growth curves (B) and doubling times (C) of HeLa cells transfected with control plasmids (control), a plasmid overexpressing the Tet2 catalytic domain (Tet2 CD), a plasmid with an shRNA targeting EndoG and a HeLa cells stably expressing the Tet2 CD and shRNA targeting EndoG.

**Supplemental Figure S16.  $\gamma$ -H2AX foci form in an EndoG and 5hmC dependent manner.** Representative images of  $\gamma$ -H2AX foci observed in HeLa cells stably transfected with control plasmids, overexpression of Tet2 Catalytic Domain (Tet2 CD), EndoG shRNA or a combination of Tet2 CD overexpression and EndoG shRNA (A).  $\gamma$ -H2AX foci were counted and grouped according to the number of foci per cell in each of the four stably transfected HeLa cell lines, in duplicate (B).

**Supplemental Figure S17.  $\gamma$ -H2AX and 53BP1 foci form in response to ionizing radiation.** Representative images of  $\gamma$ -H2AX and 53BP1 foci observed in HeLa cells exposed to 1 and 3 Gy of ionizing radiation (Left).  $\gamma$ -H2AX and 53BP1 foci were counted and grouped according to the number of foci per cell (Right).

**Supplemental Figure S18. Properties of stable cell lines from Figure 4C.**

Quantification of 5hmC content (A), Tet2 expression (B), and EndoG expression – siRNA 1 is identical to the siRNA used Supplemental Figure S14 (C).

**Supplemental Figure S19. The stably transfected HeLa cell lines are not more prone to undergo apoptosis.** Representative images of TUNEL assays performed on the HeLa cells transfected with control plasmids (control), a plasmid overexpressing the Tet2 catalytic domain (Tet2 CD), a plasmid with an shRNA targeting EndoG and a HeLa cells stably expressing the Tet2 CD and shRNA targeting EndoG (A). Quantification of TUNEL positive cells as a percent of the total cells (B).

**Supplemental Figure S20. The EndoG inhibitor from *Drosophila melanogaster* can efficiently inhibit mouse Endonuclease G.** The inhibitor of EndoG from *Drosophila melanogaster* was cloned and purified to near homogeneity from *E. coli* (A). Cytosine or 5hmC-modified substrates were treated with EndoG or EndoG the *Drosophila* inhibitor of EndoG (dEndoG) (B).

**Supplemental Figure S21. Recombination enhanced by EndoG generates error free products.** Recombinant amplicons from Figure 4B were cloned and sequenced, representative sequences are shown aligned to the expected sequence for a conservative recombinant molecule (top sequence), the relevant sequence of substrate A (sequence second from top) and the relevant sequence of substrate B (sequence third from top).

## **Supplemental Tables**

**Supplemental Table S1.** Substrate Design

**Supplemental Table S2.** Oligonucleotides Used

**Supplemental Table S3.** Proteins Co-purifying with the Endonuclease Activity Observed in Figure 2

Supplemental Figure S1

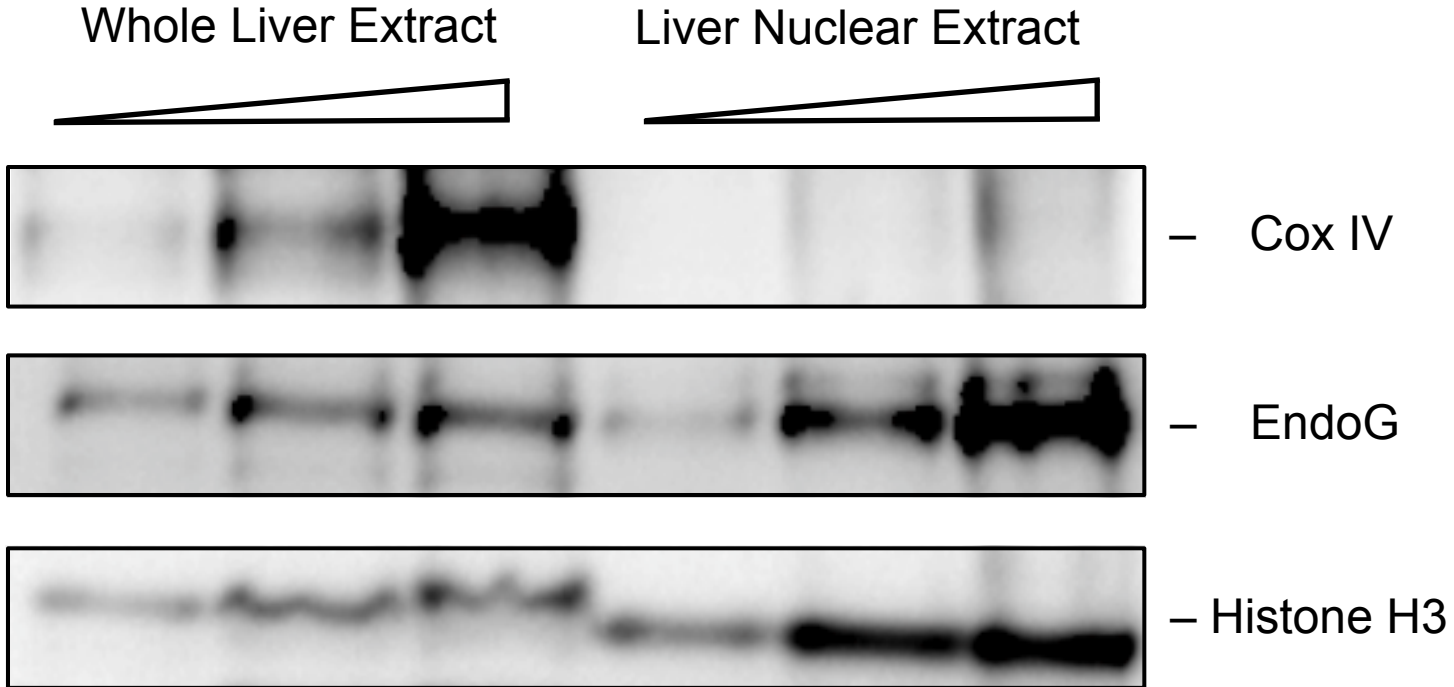

Supplemental Figure S2

A

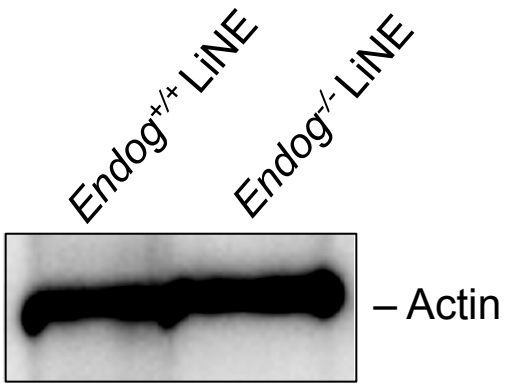

B

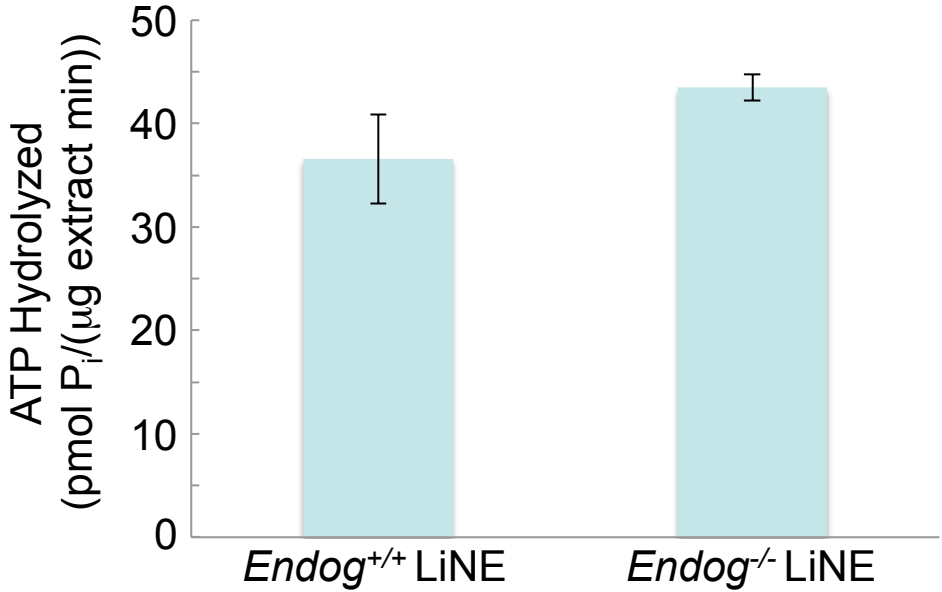

# Supplemental Figure S3

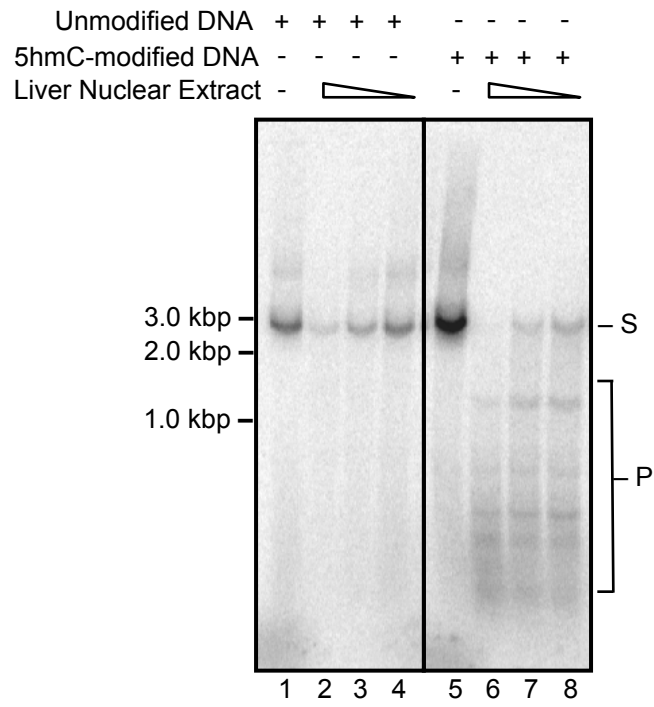



# Supplemental Figure S4

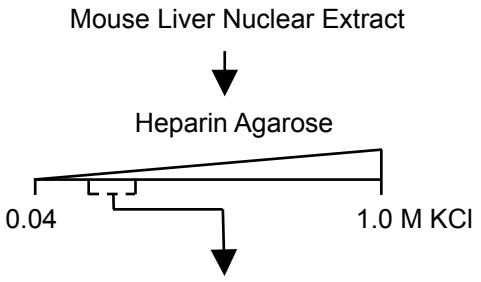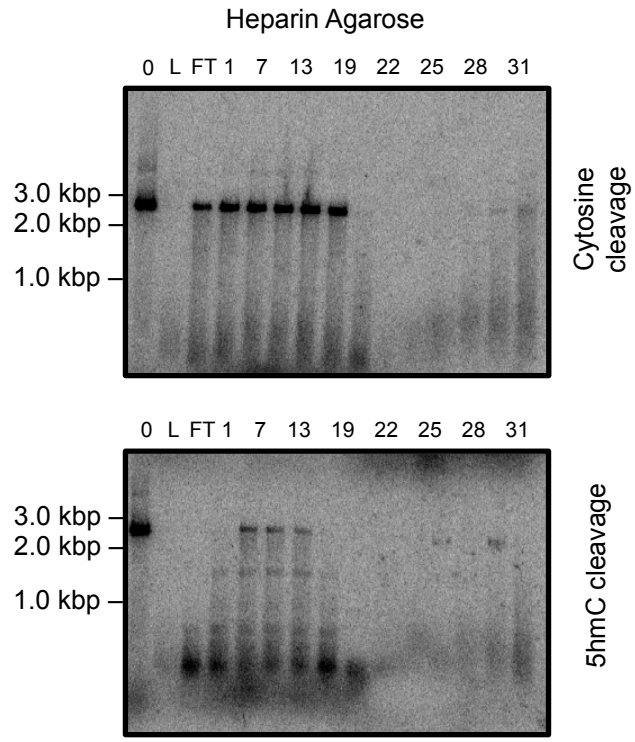



# Supplemental Figure S6

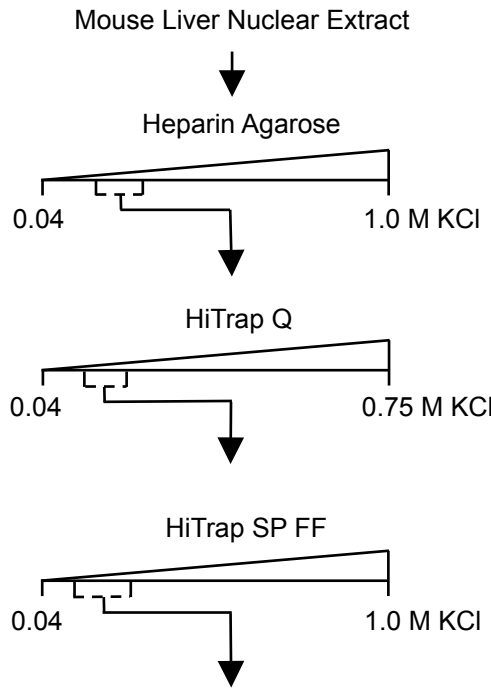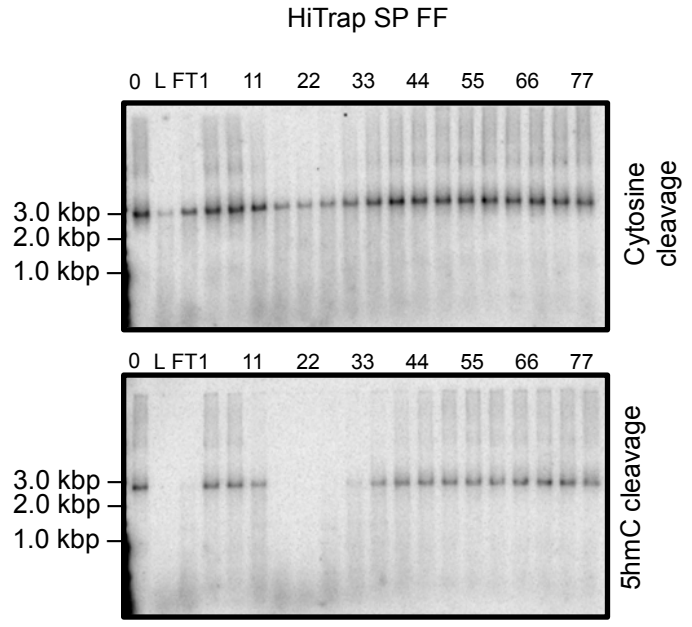

# Supplemental Figure S7

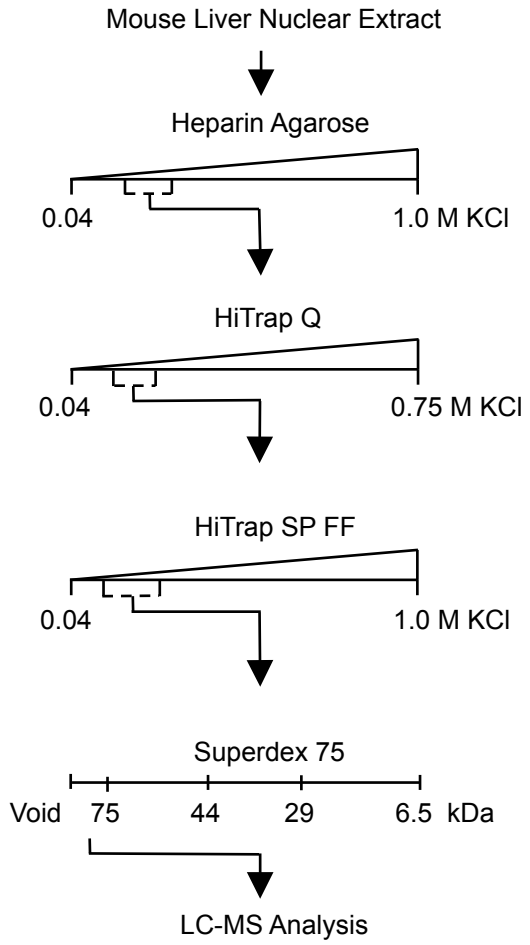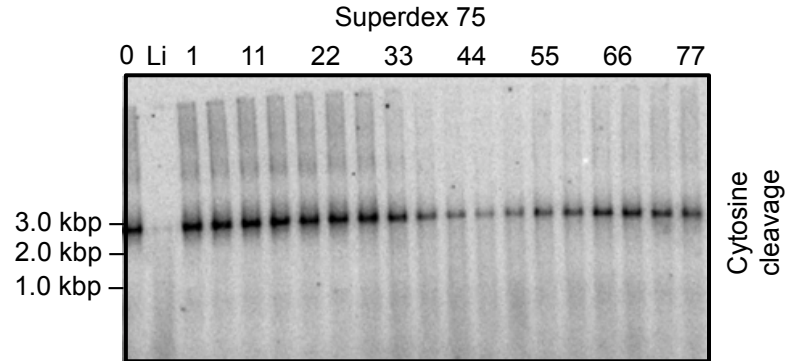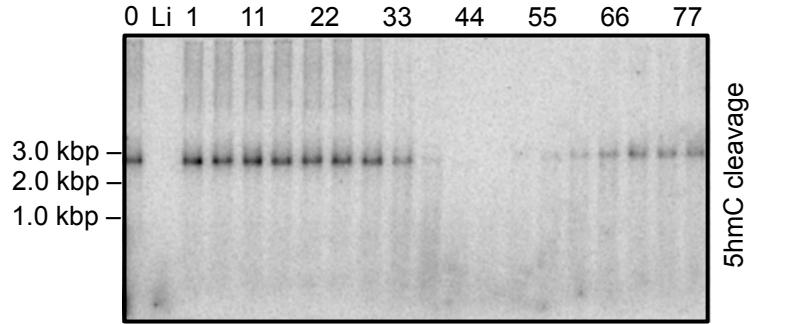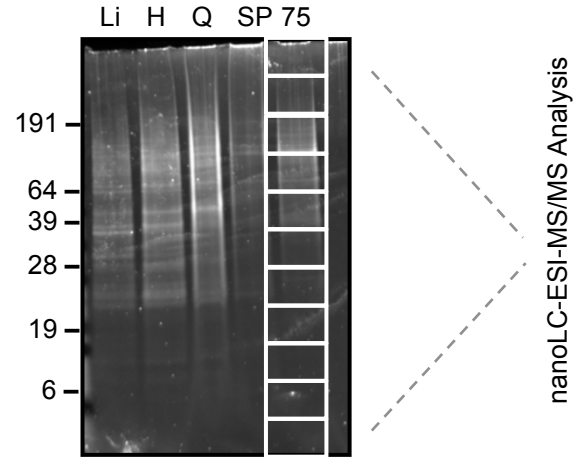

## Supplemental Figure S8

|            |            |            |             |
|------------|------------|------------|-------------|
| MRALRAGLTL | ALGAGLGAAA | EHWRRREGKA | PGLLGGRVPLL |
| PVVAADLPAL | PGGPAGGTGE | LAKYGLPGVA | QLRSRESYVL  |
| SYDPRTRGAL | WVLEQLRPER | LRGDGDRSAC | DFREDDSVHA  |
| YHRATNADYR | GSGFDRGHLA | AAANHRWSQR | AMDDTFYLSN  |
| VAPQVPHLNQ | NAWNNLERYS | RSLTRTYQNV | YVCTGPLFLP  |
| RTEADGKSYV | KYQVIGKNHV | AVPTHFFKVL | ILEAAGGQIE  |
| LSYVMPNAP  | VDETIPLERF | LVPIESIERA | SGLLFVPNIL  |
| ARAGNLKAIT | AGSK       |            |             |

Supplemental Figure S9

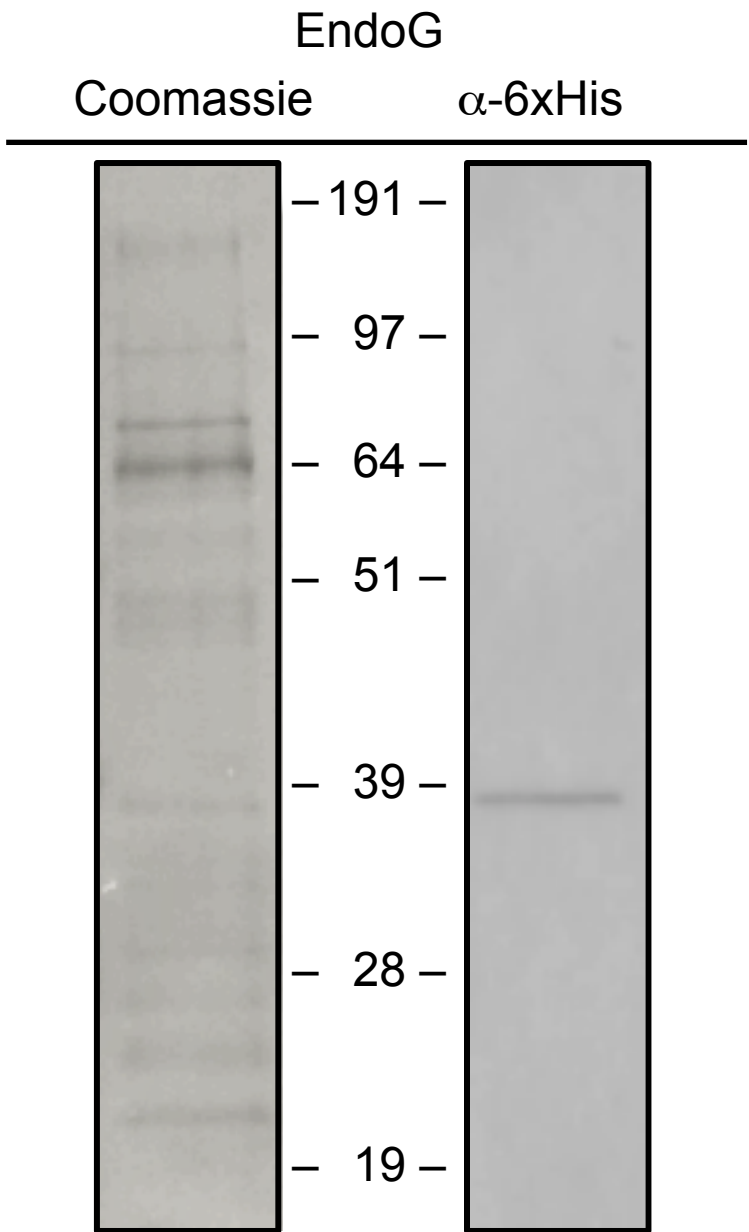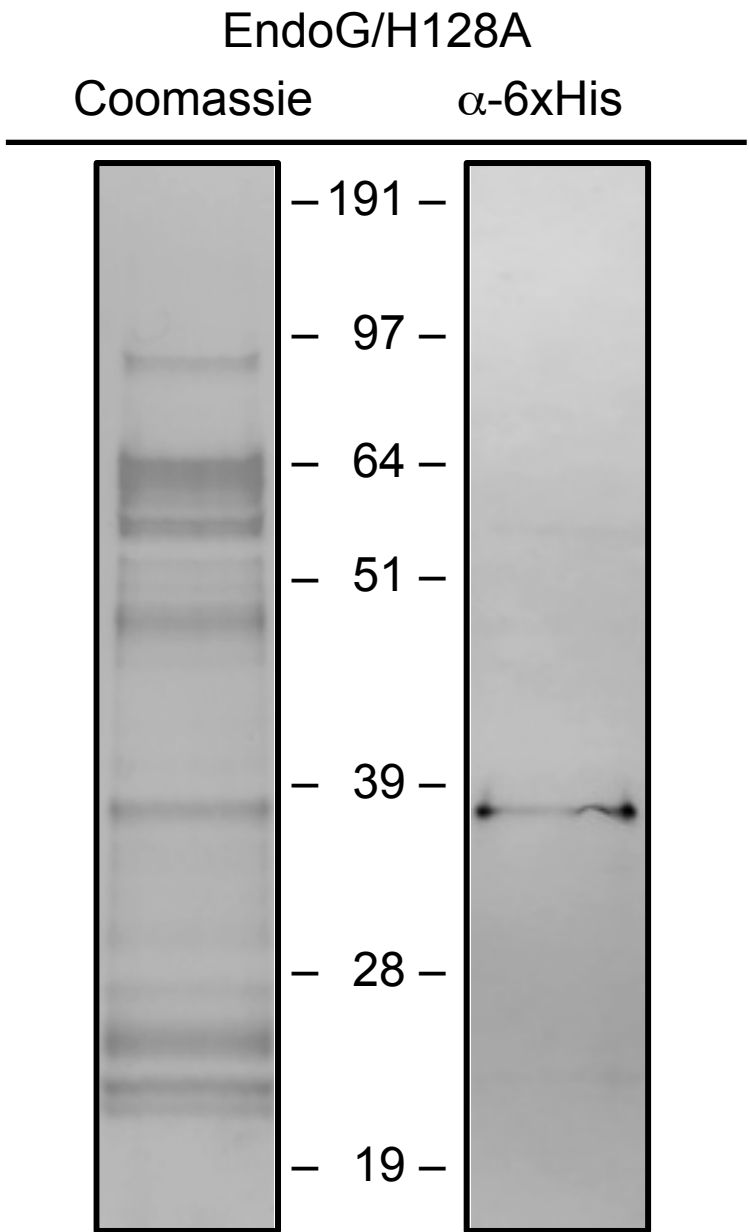

**Supplemental Figure S10**

|                    |   |   |   |   |                                                                                    |   |   |   |   |   |   |   |   |   |   |   |
|--------------------|---|---|---|---|------------------------------------------------------------------------------------|---|---|---|---|---|---|---|---|---|---|---|
| Cytosine Substrate | + | - | + | - | +                                                                                  | - | + | - | + | - | + | - | + | - | + | - |
| 5hmC Substrate     | - | + | - | + | -                                                                                  | + | - | + | - | + | - | + | - | + | - | + |
| LiNE               | - | - | + | + | -                                                                                  | - | - | - | - | - | - | - | - | - | - | - |
| Purified EndoG     | - | - | - | - |  |   |   |   |   |   |   |   |   |   |   |   |

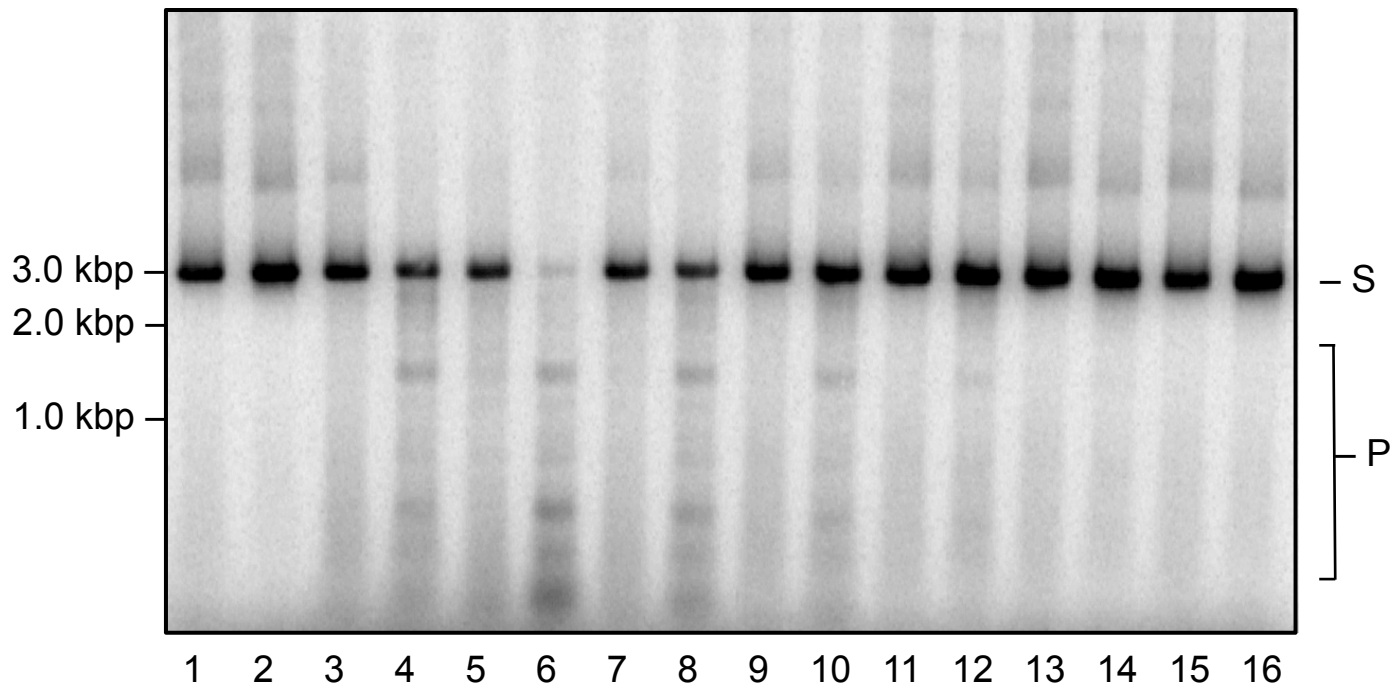

**Supplemental Figure S11**

|                    |   |                                                                                   |   |   |   |   |                                                                                    |   |   |   |   |                                                                                     |   |   |   |
|--------------------|---|-----------------------------------------------------------------------------------|---|---|---|---|------------------------------------------------------------------------------------|---|---|---|---|-------------------------------------------------------------------------------------|---|---|---|
| Cytosine Substrate | + | +                                                                                 | + | + | + | - | -                                                                                  | - | - | - | - | -                                                                                   | - | - | - |
| 5meC Substrate     | - | -                                                                                 | - | - | - | + | +                                                                                  | + | + | + | - | -                                                                                   | - | - | - |
| 5hmC Substrate     | - | -                                                                                 | - | - | - | - | -                                                                                  | - | - | - | + | +                                                                                   | + | + | + |
| Purified EndoG     | - |  |   |   |   | - |  |   |   |   | - |  |   |   |   |

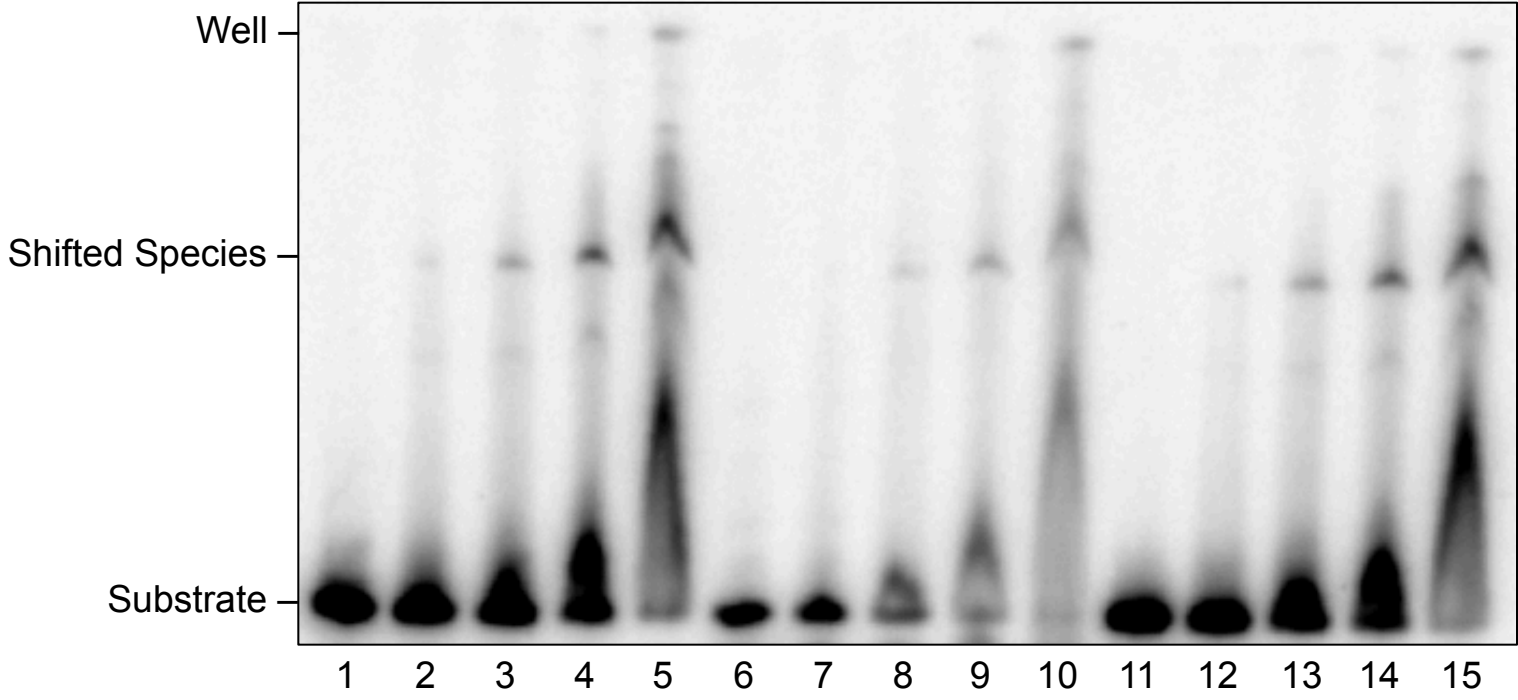



**Supplemental Figure S12**

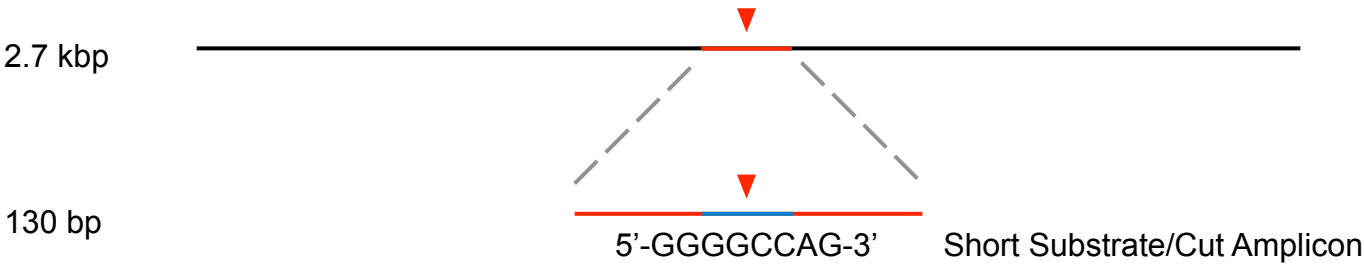

**Supplemental Figure S13**

|   |   |   |   |                              |
|---|---|---|---|------------------------------|
| + | - | - | + | Unmodified dsOligonucleotide |
| - | + | - | - | 5hmC dsOligonucleotide 5     |
| - | - | + | - | 5hmC dsOligonucleotide 6     |
| - | + | + | - | EndoG                        |
| - | - | - | + | <i>HaeIII</i>                |

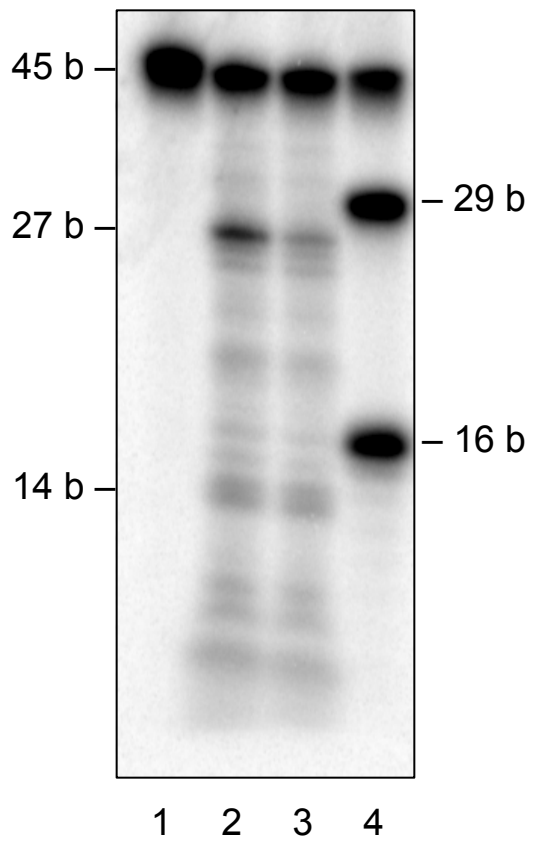

Unmodified dsOligonucleotide digested with *HaeIII*

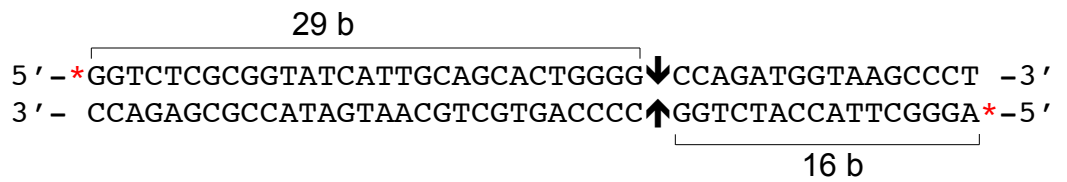

5hmC dsOligonucleotide 5 digested with EndoG

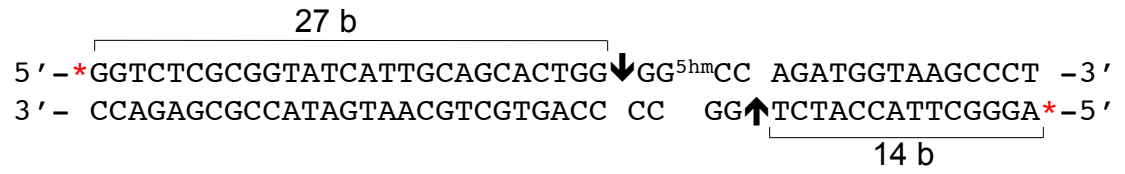

5hmC dsOligonucleotide 6 Digested with EndoG

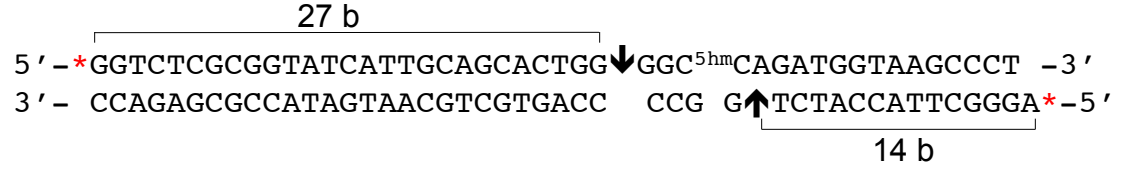

Supplemental Figure S14

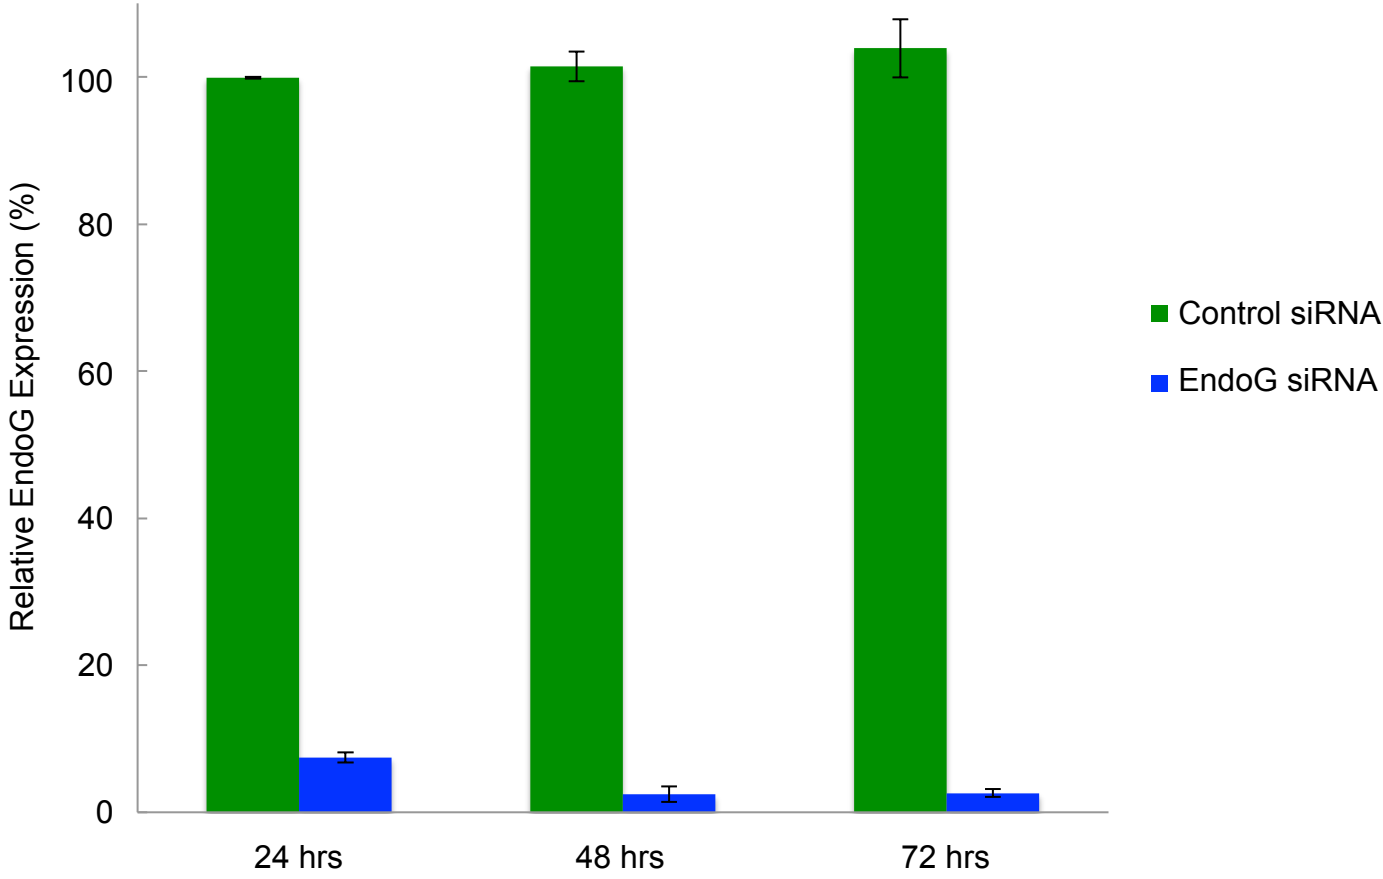

# Supplemental Figure S15

A

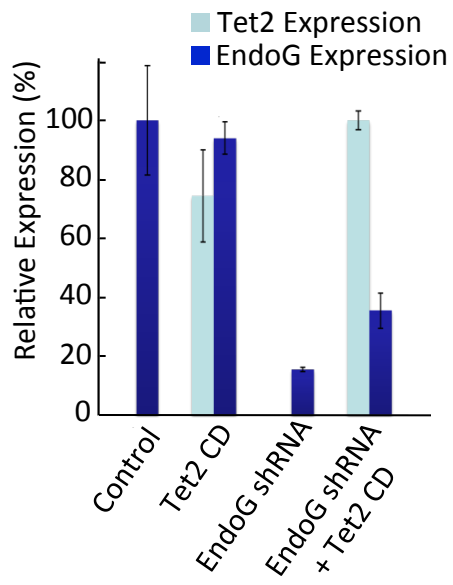

B

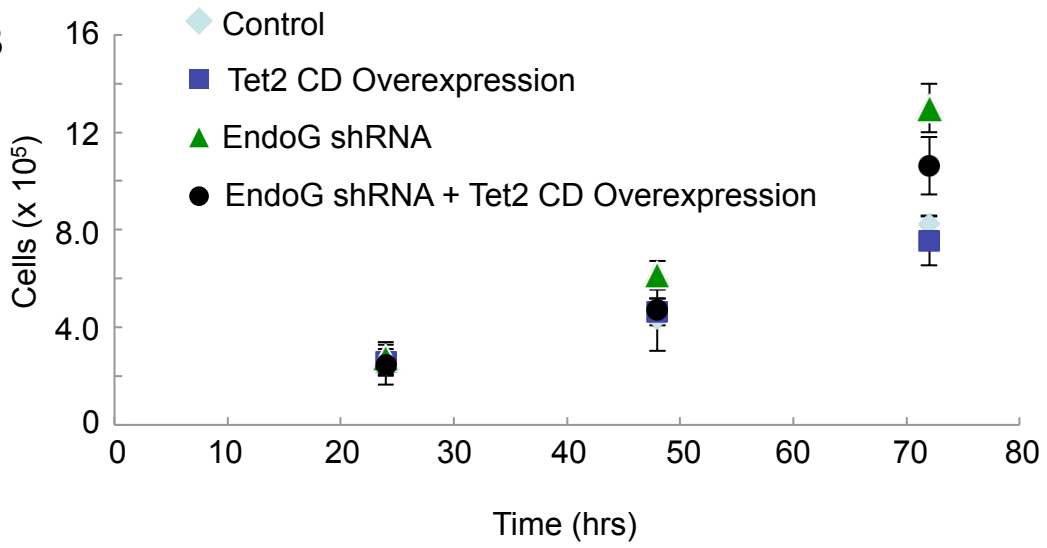

C

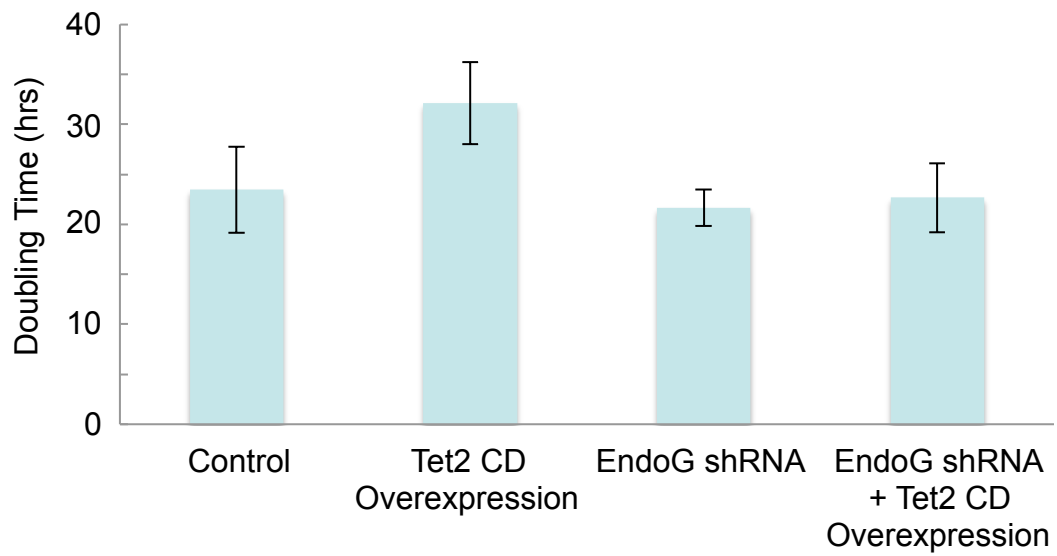

**Supplemental Figure S16**

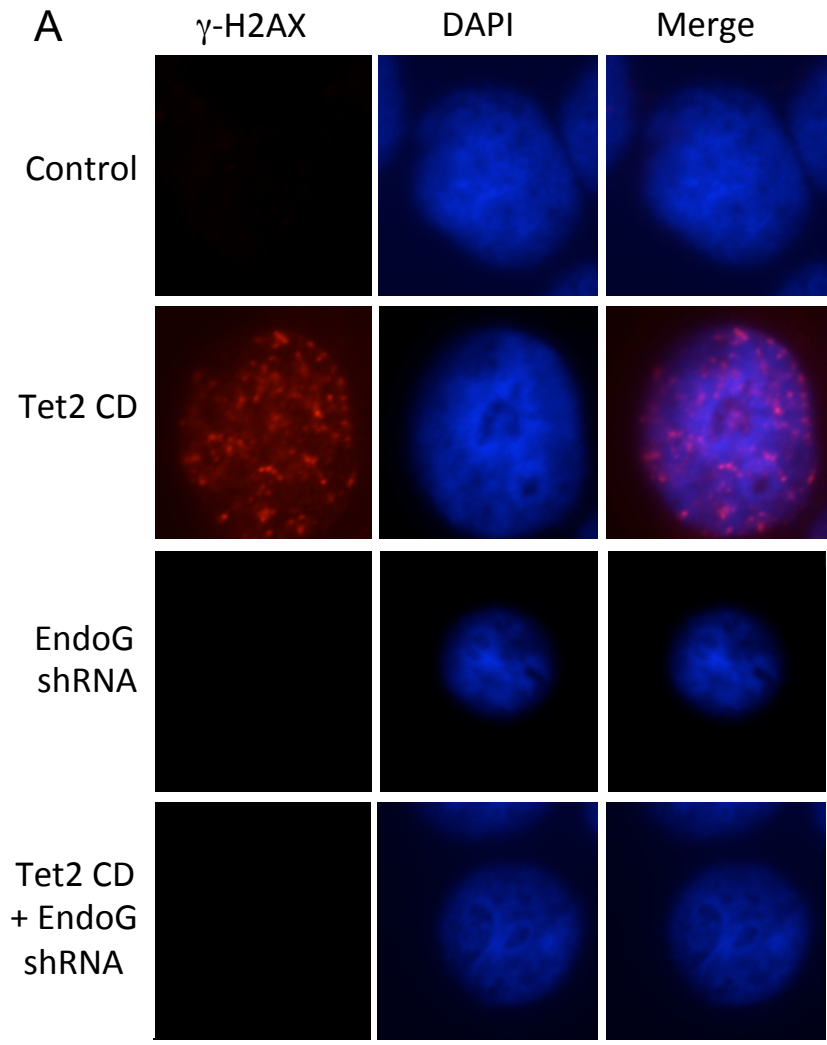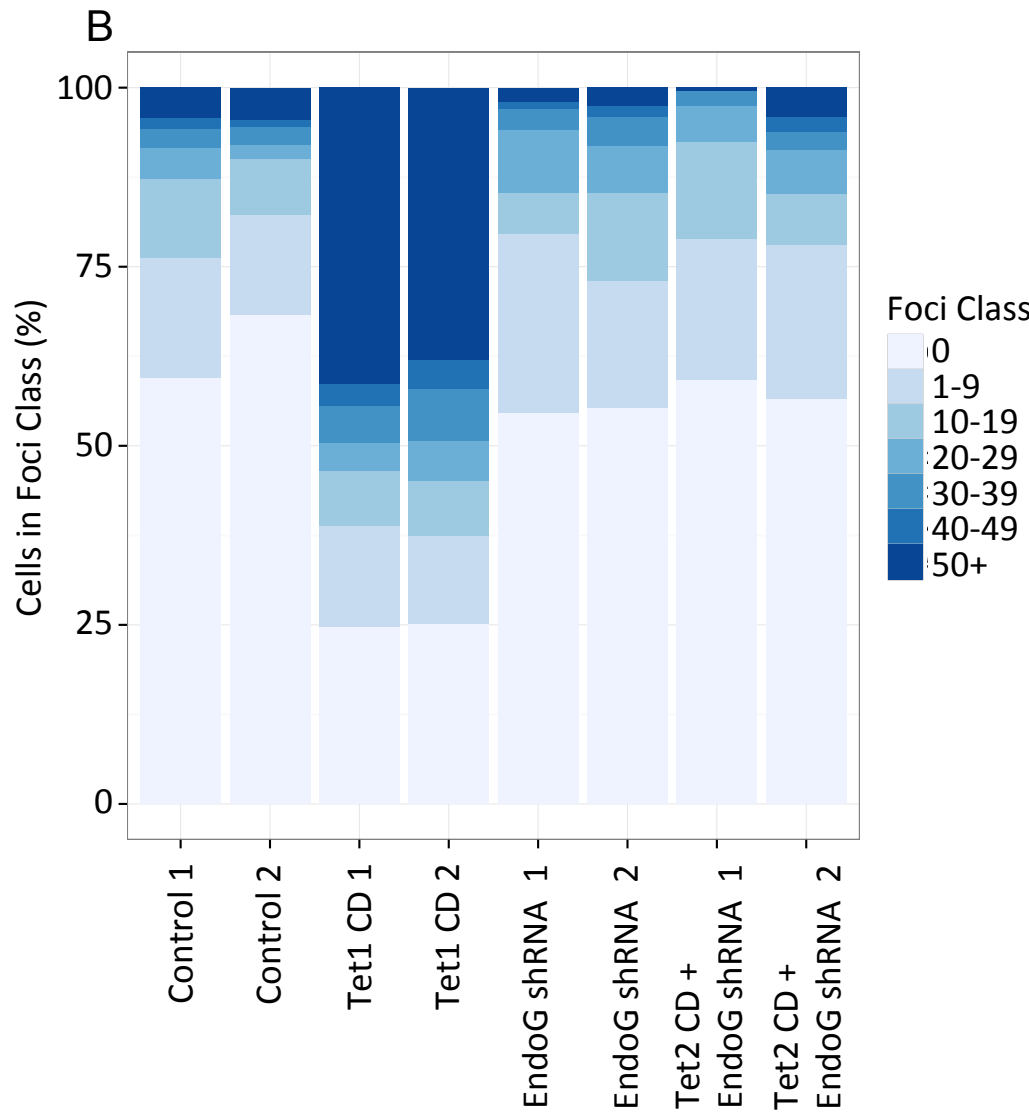

Supplemental Figure S17

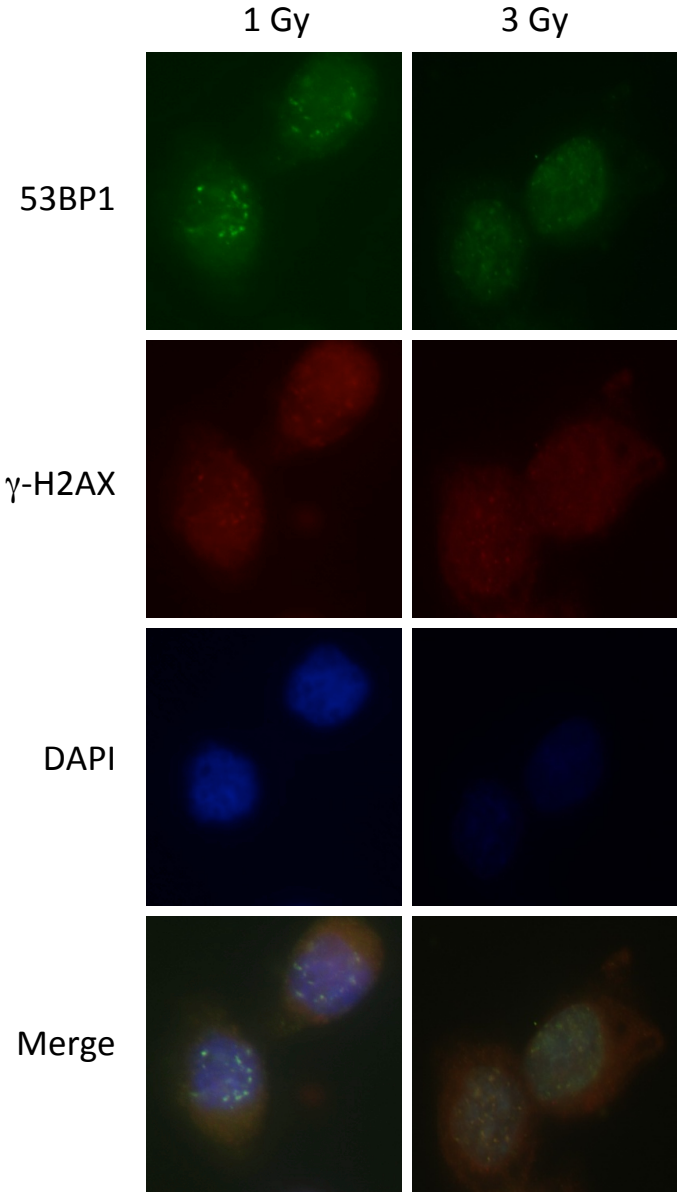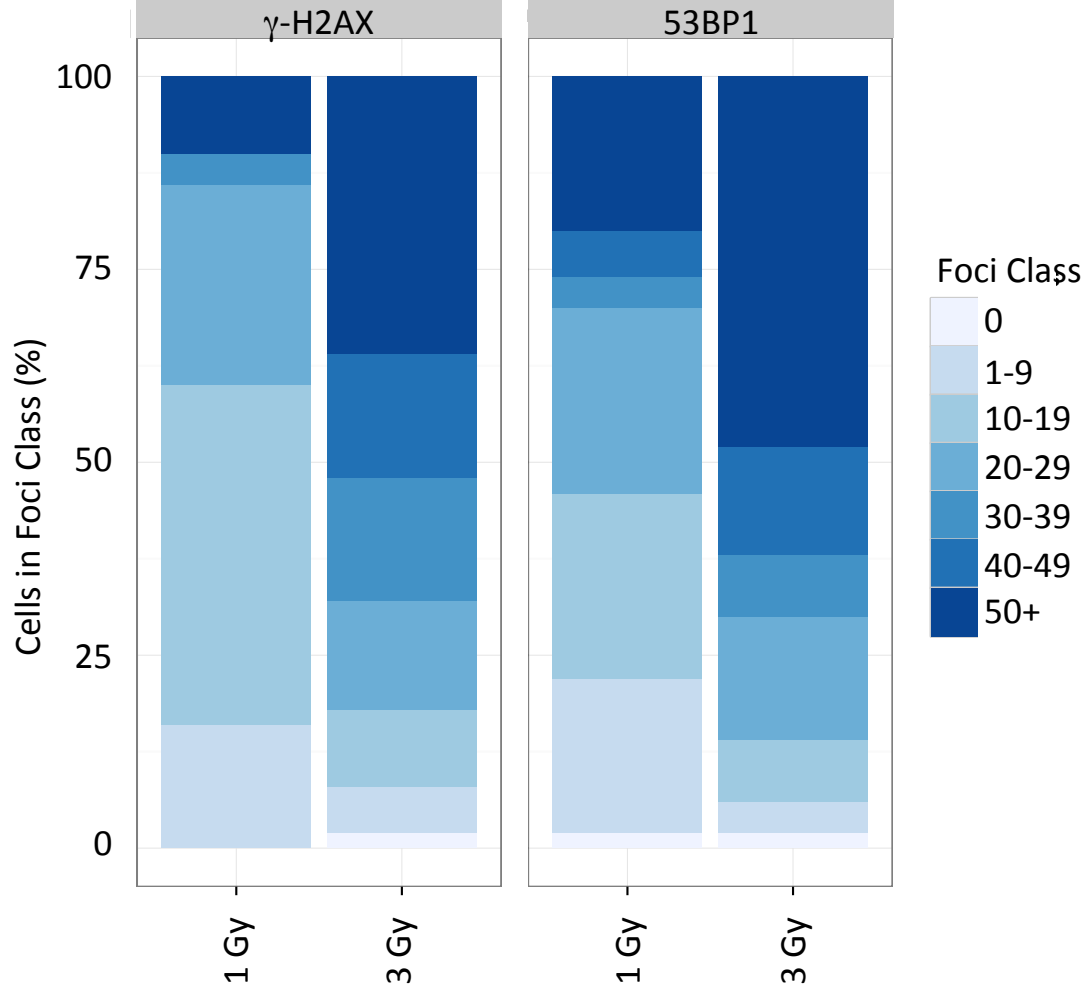

**Supplemental Figure S18**

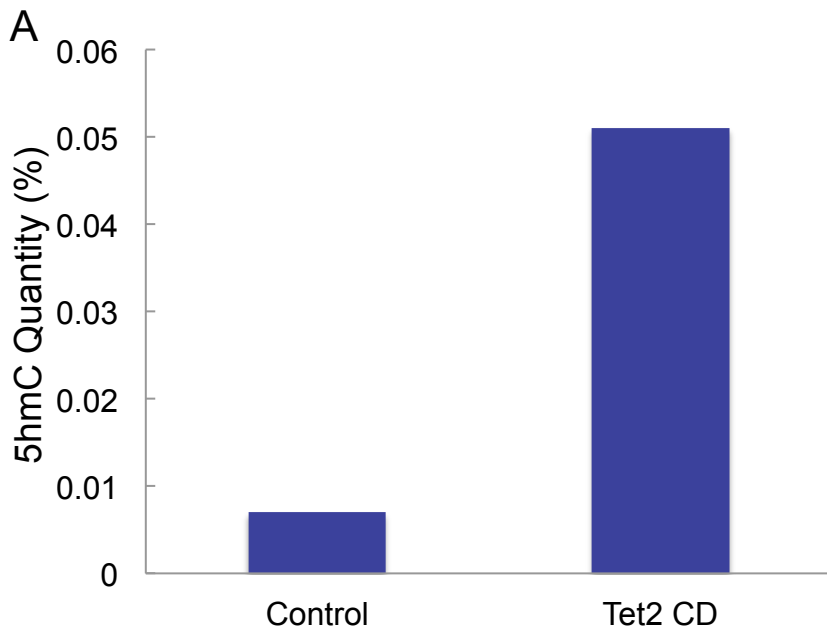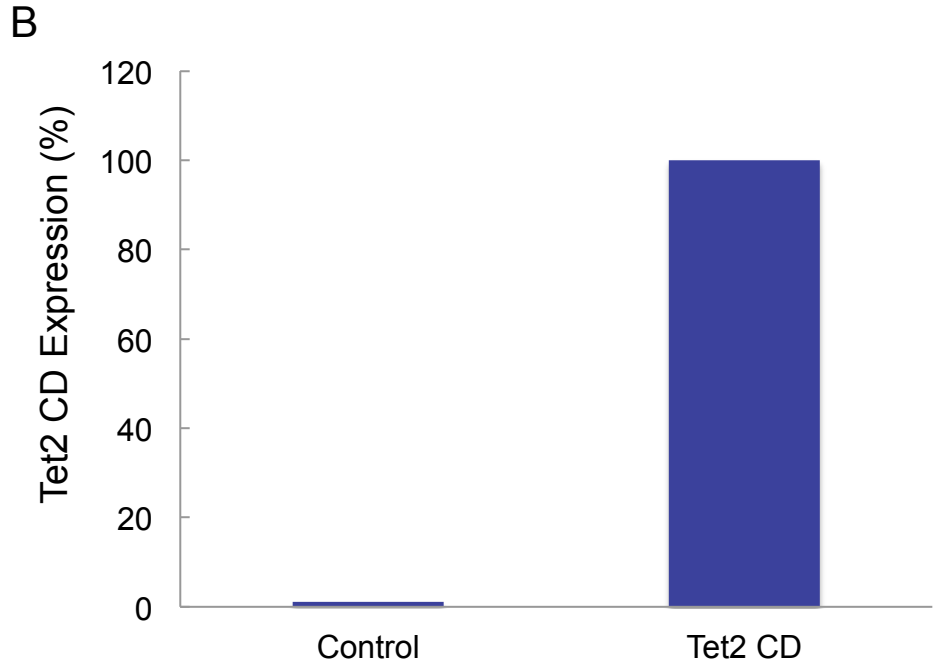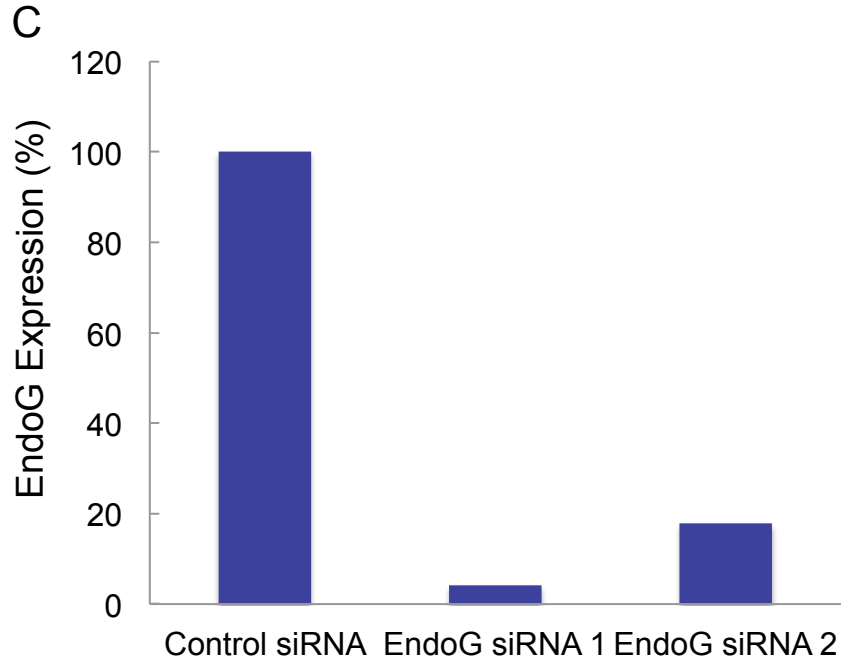

# Supplemental Figure S19

A

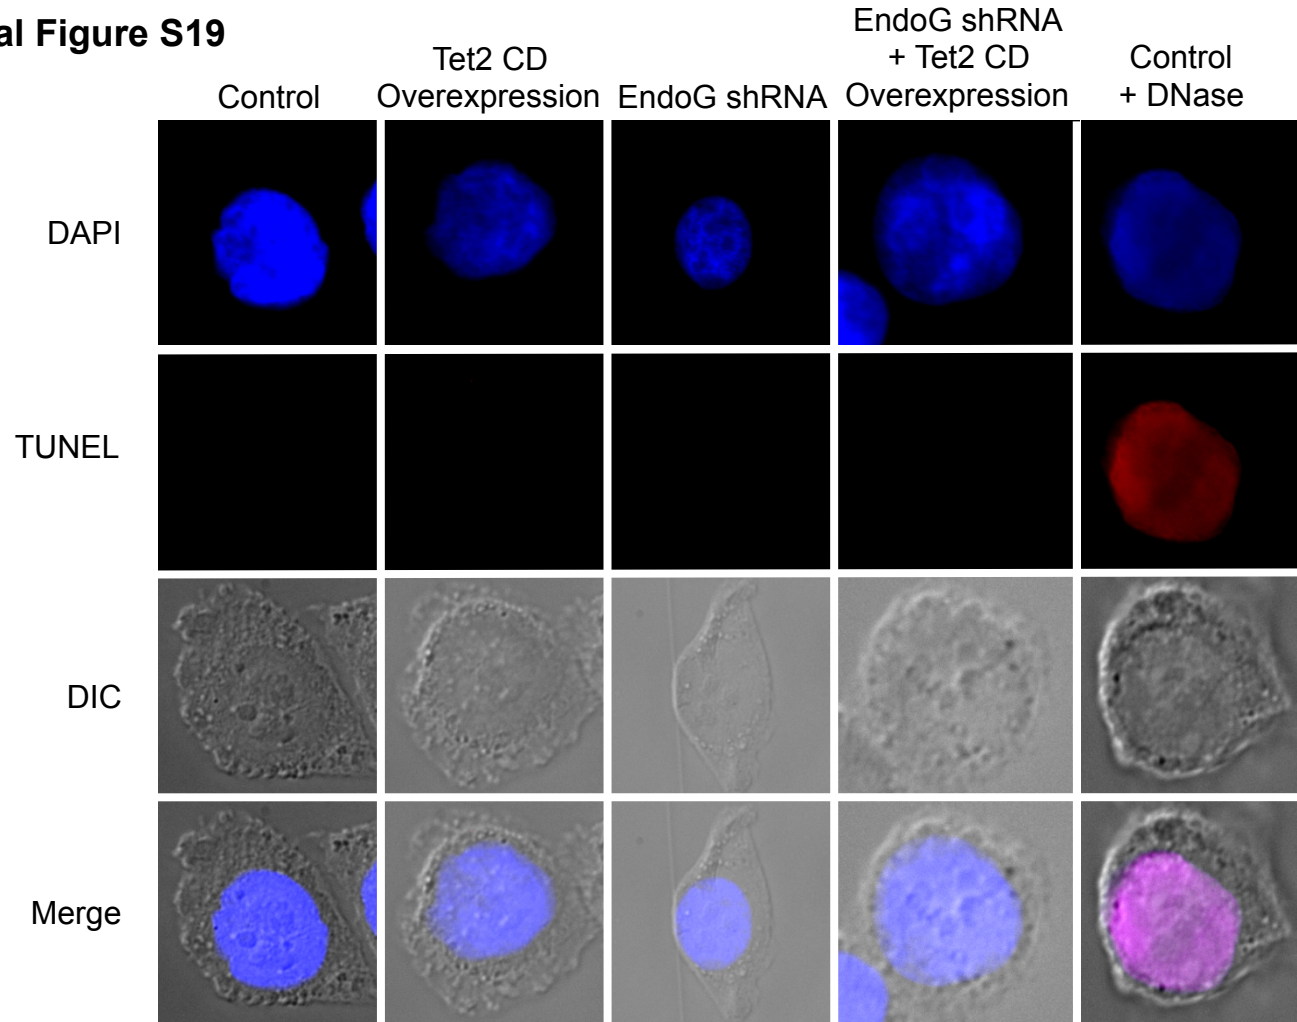

B

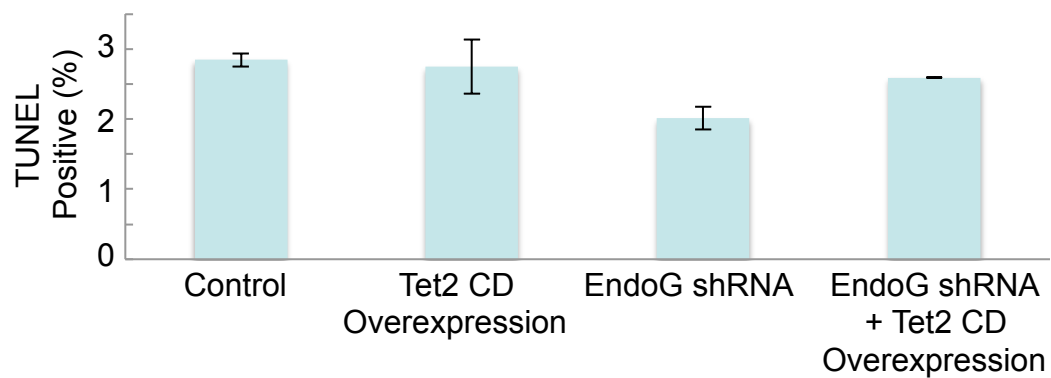



Supplemental Figure S20

dEndoG Inhibitor

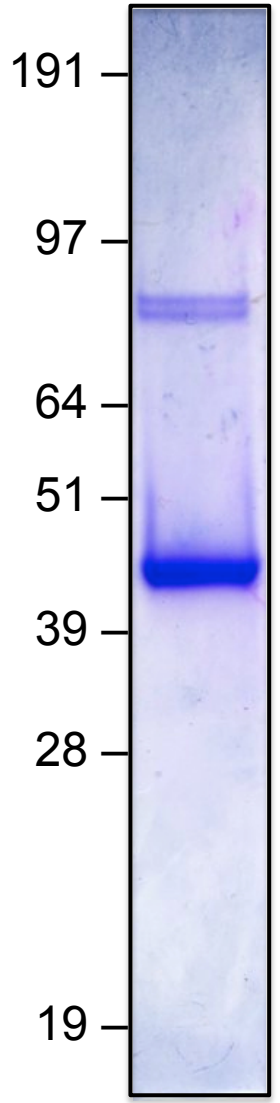

|                    |   |   |   |   |   |   |   |   |
|--------------------|---|---|---|---|---|---|---|---|
| Cytosine Substrate | + | - | + | - | + | - | + | - |
| 5hmC Substrate     | - | + | - | + | - | + | - | + |
| EndoG              | - | - | - | - | + | + | + | + |
| dEndoGI            | - | - | + | + | - | - | + | + |

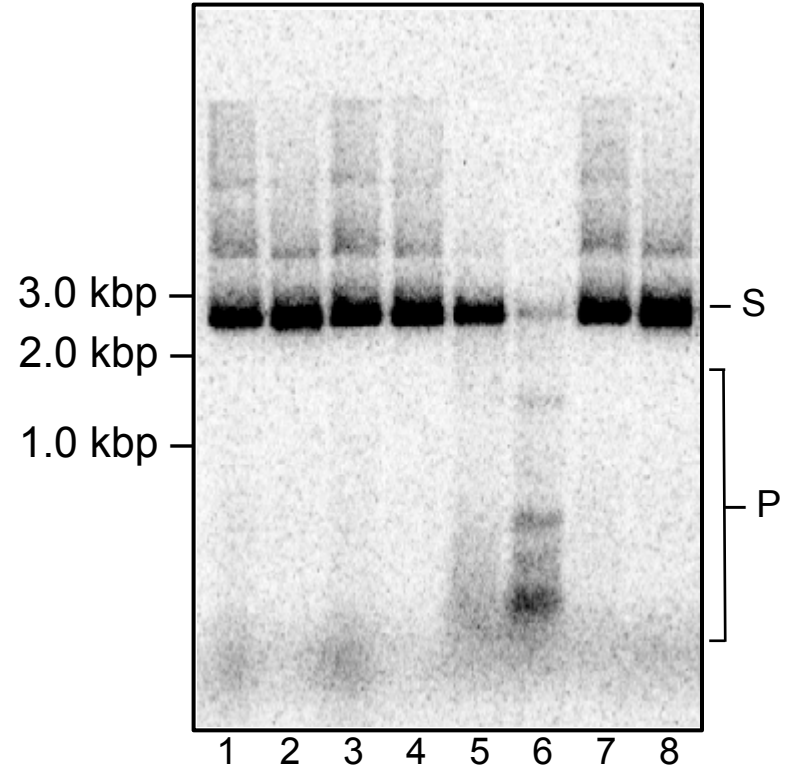

# Supplemental Figure S21

|                      |                                                                                              |     |
|----------------------|----------------------------------------------------------------------------------------------|-----|
| Recombination        | CGGTGAAAACTTCTGACACATGCAGCTCCCGGAGACGGTTCACAGCTTGTCTGTAAAGCGGATGC                            | 63  |
| Substrate A          | CGGTGAAAACTTCTGACACATGCAGCTCCCGGAGACGGTTCACAGCTTGTCTGTAAAGCGGATGC                            | 63  |
| Substrate B          | -----                                                                                        | 63  |
| LiNE + Cyt           | CGGTGAAAACTTCTGACACATGCAGCTCCCGGAGACGGTTCACAGCTTGTCTGTAAAGCGGATGC                            | 63  |
| LiNE + 5hmC          | CGGTGAAAACTTCTGACACATGCAGCTCCCGGAGACGGTTCACAGCTTGTCTGTAAAGCGGATGC                            | 63  |
| LiNE + EndoGI + Cyt  | CGGTGAAAACTTCTGACACATGCAGCTCCCGGAGACGGTTCACAGCTTGTCTGTAAAGCGGATGC                            | 63  |
| LiNE + EndoGI + 5hmC | CGGTGAAAACTTCTGACACATGCAGCTCCCGGAGACGGTTCACAGCTTGTCTGTAAAGCGGATGC                            | 63  |
|                      |                                                                                              |     |
|                      | CGGGAGCAGACAAGCCCCTCAGGGCGCGTCAGCGGGTGTGGCGGGTGTGGGGCTGGCTTAACCTATGCGGCATCAGAGCAGATTGTACT    | 153 |
|                      | CGGGAGCAGACAAGCCCCTCAGGGCGCGTCAGCGGGTGTGGCGGGTGTGGGGCTGGCTTAACCTATGCGGCATCAGAGCAGATTGTACT    | 153 |
|                      | -----                                                                                        | 153 |
|                      | CGGGAGCAGACAAGCCCCTCAGGGCGCGTCAGCGGGTGTGGCGGGTGTGGGGCTGGCTTAACCTATGCGGCATCAGAGCAGATTGTACT    | 153 |
|                      | CGGGAGCAGACAAGCCCCTCAGGGCGCGTCAGCGGGTGTGGCGGGTGTGGGGCTGGCTTAACCTATGCGGCATCAGAGCAGATTGTACT    | 153 |
|                      | CGGGAGCAGACAAGCCCCTCAGGGCGCGTCAGCGGGTGTGGCGGGTGTGGGGCTGGCTTAACCTATGCGGCATCAGAGCAGATTGTACT    | 153 |
|                      | CGGGAGCAGACAAGCCCCTCAGGGCGCGTCAGCGGGTGTGGCGGGTGTGGGGCTGGCTTAACCTATGCGGCATCAGAGCAGATTGTACT    | 153 |
|                      |                                                                                              |     |
|                      | GAGAGTGCACCATATGCGGTGTGAAATACCGCACAGATGCGTAAGGAGAAAAATACCGCATCAGGCGCCATTGCGCCATTGAGGCTGCGCAA | 243 |
|                      | GAGAGTGCACCATATGCGGTGTGAAATACCGCACAGATGCGTAAGGAGAAAAATACCGCATCAGGCGCCATTGCGCCATTGAGGCTGCGCAA | 243 |
|                      | -----GCCATTGCGCCATTGAGGCTGCGCAA                                                              | 243 |
|                      | GAGAGTGCACCATATGCGGTGTGAAATACCGCACAGATGCGTAAGGAGAAAAATACCGCATCAGGCGCCATTGCGCCATTGAGGCTGCGCAA | 243 |
|                      | GAGAGTGCACCATATGCGGTGTGAAATACCGCACAGATGCGTAAGGAGAAAAATACCGCATCAGGCGCCATTGCGCCATTGAGGCTGCGCAA | 243 |
|                      | GAGAGTGCACCATATGCGGTGTGAAATACCGCACAGATGCGTAAGGAGAAAAATACCGCATCAGGCGCCATTGCGCCATTGAGGCTGCGCAA | 243 |
|                      | GAGAGTGCACCATATGCGGTGTGAAATACCGCACAGATGCGTAAGGAGAAAAATACCGCATCAGGCGCCATTGCGCCATTGAGGCTGCGCAA | 243 |
|                      |                                                                                              |     |
|                      | CTGTTGGGAAGGGCGATCGGTGCGGGCTCTTCGCTATTACGCCAGCTGGCGAAAGGGGGATGTGCTGCAAGGCGATTAAAGTTGGGTAAC   | 333 |
|                      | CTGTTGGGAAGGGCGATCGGTGCGGGCTCTTCGCTATTACGCCAGCTGGCGAAAGGGGGATGTGCTGCAAGGCGATTAAAGTTGGGTAAC   | 333 |
|                      | CTGTTGGGAAGGGCGATCGGTGCGGGCTCTTCGCTATTACGCCAGCTGGCGAAAGGGGGATGTGCTGCAAGGCGATTAAAGTTGGGTAAC   | 333 |
|                      | CTGTTGGGAAGGGCGATCGGTGCGGGCTCTTCGCTATTACGCCAGCTGGCGAAAGGGGGATGTGCTGCAAGGCGATTAAAGTTGGGTAAC   | 333 |
|                      | CTGTTGGGAAGGGCGATCGGTGCGGGCTCTTCGCTATTACGCCAGCTGGCGAAAGGGGGATGTGCTGCAAGGCGATTAAAGTTGGGTAAC   | 333 |
|                      | CTGTTGGGAAGGGCGATCGGTGCGGGCTCTTCGCTATTACGCCAGCTGGCGAAAGGGGGATGTGCTGCAAGGCGATTAAAGTTGGGTAAC   | 333 |
|                      | CTGTTGGGAAGGGCGATCGGTGCGGGCTCTTCGCTATTACGCCAGCTGGCGAAAGGGGGATGTGCTGCAAGGCGATTAAAGTTGGGTAAC   | 333 |
|                      |                                                                                              |     |
|                      | GCCAGGGTTTTCCCAGTCACGACGTTGTAAAACGACGGCCAGTGAATTCGAGCTCGGTACCCGGGGATCCTCTAGAGTCGACCTGCA      | 420 |
|                      | GCCAGGGTTTTCCCAGTCACGACGTTGTAAAACGACGGCCAGTGAATTCGAGCTCGGTACCC-----                          | 420 |
|                      | GCCAGGGTTTTCCCAGTCACGACGTTGTAAAACGACGGCCAGTGAATTCGAGCTCGGTACCCGGGGATCCTCTAGAGTCGACCTGCA      | 420 |
|                      | GCCAGGGTTTTCCCAGTCACGACGTTGTAAAACGACGGCCAGTGAATTCGAGCTCGGTACCCGGGGATCCTCTAGAGTCGACCTGCA      | 420 |
|                      | GCCAGGGTTTTCCCAGTCACGACGTTGTAAAACGACGGCCAGTGAATTCGAGCTCGGTACCCGGGGATCCTCTAGAGTCGACCTGCA      | 420 |
|                      | GCCAGGGTTTTCCCAGTCACGACGTTGTAAAACGACGGCCAGTGAATTCGAGCTCGGTACCCGGGGATCCTCTAGAGTCGACCTGCA      | 420 |
|                      | GCCAGGGTTTTCCCAGTCACGACGTTGTAAAACGACGGCCAGTGAATTCGAGCTCGGTACCCGGGGATCCTCTAGAGTCGACCTGCA      | 420 |

## Supplemental Table S1

### 2.7 kbp Substrate sequence

GGTACCCGGGGATCCTCTAGAGTCGACCTGCAGGCATGCAAGCTTGGCGT  
AATCATGGTCATAGCTGTTTCCTGTGTGAAATTGTTATCCGCTCACAATTC  
CACACAACATACGAGCCGGAAGCATAAAGTGTAAGCCTGGGGTGCCTA  
ATGAGTGAGCTAACTCACATTAATTGCGTTGCGCTCACTGCCCGCTTTCCA  
GTCGGGAAACCTGTCGTGCCAGCTGCATTAATGAATCGGCCAACGCGCGG  
GGAGAGGCGGTTTTCGTATTGGGCGCTCTTCCGCTTCCTCGCTCACTGACT  
CGCTGCGCTCGGTTCGTTCGGCTGCGGCGAGCGGTATCAGCTCACTCAAAG  
GCGGTAATACGGTTATCCACAGAATCAGGGGATAACGCAGGAAAGAACA  
TGTGAGCAAAAGGCCAGCAAAAGGCCAGGAACCGTAAAAAGGCCGCGTT  
GCTGGCGTTTTTCCATAGGCTCCGCCCCCTGACGAGCATCACAAAAATC  
GACGCTCAAGTCAGAGGTGGCGAAACCCGACAGGACTATAAAGATACCA  
GGGTTTCCCCCTGGAAGCTCCCTCGTGCCTCTCCTGTTCCGACCCTGCCG  
CTTACCGGATACCTGTCCGCCTTTCTCCCTTCGGGAAGCGTGGCGCTTTCT  
CATAGCTCACGCTGTAGGTATCTCAGTTCGGTGTAGGTGTTTCGCTCCAAG  
CTGGGCTGTGTGCACGAACCCCCGTTTCAGCCCGACCCTGCGCCTTATCC  
GGTAACTATCGTCTTGAGTCCAACCCGGTAAGACACGACTTATCGCCACT  
GGCAGCAGCCACTGGTAACAGGATTAGCAGAGCGAGGTATGTAGGCGGT  
GCTACAGAGTTCTTGAAGTGGTGGCCTAACTACGGCTACACTAGAAGAAC  
AGTATTTGGTATCTGCGCTCTGCTGAAGCCAGTTACCTTCGGAAAAAGAG  
TTGGTAGCTCTTGATCCGGCAAACAAACCACCGCTGGTAGCGGTGGTTTTT  
TTGTTTGCAAGCAGCAGATTACGCGCAGAAAAAAGGATCTCAAGAAGAT  
CCTTTGATCTTTTCTACGGGGTCTGACGCTCAGTGGAACGAAAACCTCACGT  
TAAGGGATTTTGGTCATGAGATTATCAAAAAGGATCTTCACCTAGATCCTT  
TTAAATTA AAAATGAAGTTTTAAATCAATCTAAAGTATATATGAGTAAAC  
TTGGTCTGACAGTTACCAATGCTTAATCAGTGAGGCACCTATCTCAGCGAT  
CTGTCTATTTTCGTTTCATCCATAGTTGCCTGACTCCCCGTCGTGTAGATAAC  
TACGATACGGGAGGGCTTACCATCTGGCCCCAGTGCTGCAATGATACCGC  
GAGACCCACGCTCACCGGCTCCAGATTTATCAGCAATAAACAGCCAGCC  
GGAAGGGCCGAGCGCAGAAGTGGTCCTGCAACTTTATCCGCCTCCATCCA  
GTCTATTAATTGTTGCCGGGAAGCTAGAGTAAGTAGTTCGCCAGTTAATA  
GTTTGCGCAACGTTGTTGCCATTGCTACAGGCATCGTGGTGTACGCTCGT  
CGTTTGGTATGGCTTCATTCAGCTCCGGTTCCCAACGATCAAGGCGAGTTA  
CATGATCCCCATGTTGTGCAAAAAGCGGTTAGCTCCTTCGGTCCTCCGA  
TCGTTGTCAGAAGTAAGTTGGCCGCAAGTGTATCACTCATGGTTATGGCAG  
CACTGCATAATTCTCTTACTGTCATGCCATCCGTAAGATGCTTTTCTGTGA  
CTGGTGAGTACTCAACCAAGTCATTCTGAGAATAGTGTATGCGGCGACCG  
AGTTGCTCTTGCCCGGCGTCAATACGGGATAATACCGCGCCACATAGCAG  
AACTTTAAAAGTGCTCATCATTGGAAAACGTTCTTCGGGGCGAAAACCTCT  
CAAGGATCTTACCGCTGTTGAGATCCAGTTCGATGTAACCCACTCGTGAC  
CCAACCTGATCTTCAGCATCTTTTACTTTACCAGCGTTTCTGGGTGAGCAA  
AACAGGAAGGCAAAAATGCCGCAAAAAGGGGAATAAGGGCGACACGGA  
AATGTTGAATACTCATACTCTTCTTTTCAATATTATTGAAGCATTTATCA  
GGGTTATTGTCTCATGAGCGGATACATATTTGAATGTATTTAGAAAAATA  
AACAAATAGGGGTTCCGCGCACATTTCCCCGAAAAGTGCCACCTGACGTC  
TAAGAAACCATTATTATCATGACATTAACCTATAAAAATAGGCGTATCAC  
GAGGCCCTTTCGTCTCGCGCGTTTCGGTGTGACGGTGAAAACCTCTGAC

ACATGCAGCTCCCGGAGACGGTCACAGCTTGTCTGTAAGCGGATGCCGGG  
AGCAGACAAGCCCGTCAGGGCGCGTCAGCGGGTGTGGCGGGTGTCCGG  
GCTGGCTTAACTATGCGGCATCAGAGCAGATTGTAAGTGCACCAT  
ATGCGGTGTGAAATACCGCACAGATGCGTAAGGAGAAAATACCGCATCA  
GGCGCCATTCGCCATTCAGGCTGCGCAACTGTTGGGAAGGGCGATCGGTG  
CGGGCCTCTTCGCTATTACGCCAGCTGGCGAAAGGGGGATGTGCTGCAAG  
GCGATTAAGTTGGGTAAACGCCAGGGTTTTCCAGTCACGACGTTGTAAAA  
CGACGGCCAGTGAATTCGAGCTCGGTACCCGGGGATCCTCTAGAGT

pUC19 For and pUC19 Rev primers (Sequences in Supplemental Table S2) were used to amplify the 2.7 kbp substrate

## **CUT ASSAY SUBSTRATE DESIGN**

### **Core Substrate Insert Sequence**

Top pUC-WT

5'-CCCGTCGTGTAGATAACTACGATACGGGAGGGCTTACCATCTGGCCCCA  
GTGCTGCAATGATACCGCGAGACCCACGCTCACCA-3'

Bottom pUC-WT

5'-GGTGAGCGTGGGTCTCGCGGTATCATTGCAGCACTGGGGCCAGATGGT  
AAGCCCTCCCGTATCGTAGTTATCTACACGACGGGA-3'

### **Mutated Core Insert Sequence**

Top pUC-Mut

5'-CCCGTCGTGTAGATAACTACGATACGGGAGGGCTTACCATCTAATTTTA  
GTGCTGCAATGATACCGCGAGACCCACGCTCACCA-3'

Bot pUC-Mut

5'-GGTGAGCGTGGGTCTCGCGGTATCATTGCAGCACTAAAATTAGATGGTA  
AGCCCTCCCGTATCGTAGTTATCTACACGACGGGA-3'

Each Sequence was annealed to its complement and cloned into pCR2.1-Topo. The sequence was amplified from the vector using pCR2.1 For and pCR2.1 Rev creating the 130 bp substrate shown utilized in Figure 3A. These inserts after ligation into pCR2.1-Topo created the Core Substrate and the Core Mutated Substrate used in Figure 4.

## **RECOMBINATION ASSAY SUBSTRATE DESIGN**

Substrate A sequence

TCGCGCGTTTTCCGGTGATGACGGTGAAAACCTCTGACACATGCAGCTCCCG  
GAGACGGTCACAGCTTGTCTGTAAGCGGATGCCGGGAGCAGACAAGCCC

GTCAGGGCGCGTCAGCGGGTGTGGCGGGTGTGCGGGGCTGGCTTAACTAT  
GCCGCATCAGAGCAGATTGTACTGAGAGTGCACCATATGCGGTGTGAAAT  
ACCGCACAGATGCGTAAGGAGAAAATACCGCATCAGGCGCCATTTCGCCAT  
TCAGGCTGCGCAACTGTTGGGAAGGGCGATCGGTGCGGGCCTCTTCGCTT  
TACGCCAGCTGGCGAAAGGGGGATGTGCTGCAAGGCGATTAAGTTGGGTA  
ACGCCAGGGTTTTCCCAGTCACGACGTTGTAAAACGACGGCCAGTGAATT  
CGAGCTCGGTACCCGACCTGCAGGCATGCAAGCTTGGCGTAATCATGGCA  
TAGCTGTTTTCTGTGTGAAATTGTTATCCGCTCACAATTCACACAACATA  
CGAGCCGGAAGCATAAAGTGTAAGCCTGGGGTGCCTAATGAGTGAGCT  
AACTCACATTAATTGCGTTGCGCTCACTGCCCGCTTTCAGTCGGGAAACC  
TGTCGTGCCAGCTGCATTAATGAATCGGCCAACGCGCGGGGAGAGGCGGT  
TTGCGTATTGGGCGCTCTTCCGCTTCCTCGCTCACTGACTCGCTGCGCTCG  
GTCGTTTCGGCTGCGGCGAGCGGTATCAGCTCACTCAAAGGCGGTAATACG  
GTTATCCACAGAATCAGGGGATAACGCAGGAAAGAACATGTGAGCAAAA  
GGCCAGCAAAAGGCCAGGAACCGTAAAAAGGCCGCGTTGCTGGCGTTTTT  
CCATAGGCTCCGCCCCCTGACGAGCATCAGAAAATCGACGCTCAAGTC  
AGAGGTGGCGAAACCCGACAGGACTATAAAGATACCAGGCGTTTCCCCCT  
GGAAGCTCCCTCGTGCGCTCTCCTGTTCCGACCCTGCCGCTTACCGGATAC  
CTGTCCGCCTTCTCCCTTCGGGAAGCGTGGCGCTTCTCATAGCTCACGC  
TGTAGGTATCTCAGTTCGGTGTAGGTCGTTTCGCTCCAAGCTGGGCTGTGTG  
CACGAACCCCCCGTTCAGCCCAGCGCTGCGCCTTATCCGGTAACTATCGT  
CTTGAGTCCAACCCGGTAAGACACGACTTATCGCCACTGGCAGCAGCCAC  
TGGTAAACAGGATTAGCAGAGCGAGGTATGTAGGCGGTGCTACAGAGTTCT  
TGAAGTGGTGGCCTAACTACGGCTACACTAGAAGAACAGTATTTGGTATC  
TGCGCTCTGCTGAAGCCAGTTACCTTCGGAAAAAGAGTTGGTAGCTCTTG  
ATCCGGCAAACAACCCAGCTGGTAGCGGTGGTTTTTTTTGTTTGCAAGC  
AGCAGATTACGCGCAGAAAAAAGGATCTCAAGAAGATCCTTTGATCTTT  
TCTACGGGGTCTGACGCTCAGTGGAACGAAAACCTCACGTTAAGGGATTTT  
GGTCATGAGATTATCAAAAAGGATCTTCACCTAGATCCTTTTAAATAAA  
AATGAAGTTTTAAATCAATCTAAAGTATATATGAGTAAACTTGGTCTGAC  
AGTTACCAATGCTTAATCAGTGAGGCACCTATCTCAGCGATCTGTCTATTT  
CGTTCATCCATAGTTGCCTGACTCCCCGTCGTGTAGATAACTACGATACGG  
GAGGGCTTACCATCTGGCCCCAGTGCTGCAATGATACCGCGAGACCCACG  
CTCACCGGCTCCAGATTTATCAGCAATAAACCAGCCAGCCGGAAGGGCCG  
AGCGCAGAAGTGGTCCCTGCAACTTTATCCGCCTCCATCCAGTCTATTAATT  
GTTGCCGGGAAGCTAGAGTAAGTAGTTCGCCAGTTAATAGTTTGCGCAAC  
GTTGTTGCCATTGCTACAGGCATCGTGGTGTACGCTCGTCGTTTGGTATG  
GCTTCATTCAGCTCCGGTTCCCAACGATCAAGGCGAGTTACATGATCCCC  
ATGTTGTGCAAAAAGCGGTTAGCTCCTTCGGTCCCTCCGATCGTTGTCAGA  
AGTAAGTTGGCCGCAGTGTTATCACTCATGGTTATGGCAGCACTGCATAA  
TTCTCTTACTGTATGCCATCCGTAAGATGCTTTTCTGTGACTGGTGAGTA  
CTCAACCAAGTCATTCTGAGAATAGTGTATGCGGCGACCGAGTTGCTCTT  
GCCCCGGCGTCAATACGGGATAATACCGCGCCACATAGCAGAACTTTAAAA  
GTGCTCATCATTGGAAAACGTTCTTCGGGGCGAAAACCTCTCAAGGATCTT  
ACCGCTGTTGAGATCCAGTTCGATGTAACCCACTCGTGCACCCAACTGATC  
TTCAGCATCTTTTACTTTCACCAGCGTTTCTGGGTGAGCAAAAACAGGAAG  
GCAAAATGCCGCAAAAAGGGAATAAGGGCGACACGGAAATGTTGAATA  
CTCATACTCTTCTTTTCAATATTATTGAAGCATTTATCAGGGTTATTGTC  
TCATGAGCGGATACATATTTGAATGTATTTAGAAAAATAAACAAATAGGG  
GTTCCGCGCACATTTCCCCGAAAAGTGCCACCTGACGTCTAAGAAACCAT

TATTATCATGACATTAACCTATAAAAATAGGCGTATCACGAGGCCCTTTTCG  
TC

Substrate B sequence

GCCATTCGCCATTCAGGCTGCGCAACTGTTGGGAAGGGCGATCGGTGCGG  
GCCTCTTCGCTATTACGCCAGCTGGCGAAAGGGGGATGTGCTGCAAGGCG  
ATTAAGTTGGGTAACGCCAGGGTTTTCCCAGTCACGACGTTGTAAAACGA  
CGGCCAGTGAATTCGAGCTCGGTACCCGGGGATCCTCTAGAGTCGACCTG  
CAGGCATGCAAGCTTGGCGTAATCATGGTCATAGCTGTTTCCTGTGTGAA  
ATTGTTATCCGCTCACAAATCCACACAACATACGAGCCGGAAGCATAAAG  
TGAAAGCCTGGGGTGCCTAATGAGTGAGCTAACTCACATTAATTGCGTT  
GCGCTCACTGCCCCTTTCCAGTCGGGAAACCTGTTCGTGCCAGCTGCATTA  
ATGAATCGGCCAACGCGCGGGGAGAGGCGGTTTTGCGTATTGGGCGCTCTT  
CCGCTTCCCTCGCTCACTGACTCGCTGCGCTCGGTTCGTTCCGGCTGCGGCGAG  
CGGTATCAGCTCACTCAAAGGCGGTAATACGGTTATCCACAGAATCAGGG  
GATAACGCAGGAAAGAACATGTGAGCAAAAGGCCAGCAAAAGGCCAGGA  
ACCGTAAAAAGGCCGCGTTGCTGGCGTTTTTCCATAGGCTCCGCCCCCTG  
ACGAGCATCACAAAATCGACGCTCAAGTCAGAGGTGGCGAAACCCGAC  
AGGACTATAAAGATACCAGGCGTTTTCCCCTGGAAGCTCCCTCGTGCGCT  
CTCCTGTTCCGACCCTGCCGCTTACCGGATACCTGTCCGCCTTTCTCCCTC  
GGGAAGCGTGGCGCTTTCTCATAGCTCACGCTGTAGGTATCTCAGTTCGGT  
GTAGGTCGTTTCGCTCCAAGCTGGGCTGTGTGCACGAACCCCCCGTTCAGC  
CCGACCGCTGCGCCTTATCCGGTAACTATCGTCTTGAGTCCAACCCGGTAA  
GACACGACTTATCGCCACTGGCAGCAGCCACTGGTAACAGGATTAGCAGA  
GCGAGGTATGTAGGCGGTGCTACAGAGTTCCTGAAGTGGTGGCCTAACTA  
CGGCTACACTAGAAGAACAGTATTTGGTATCTGCGCTCTGCTGAAGCCAG  
TTACCTTCGGAAAAAGAGTTGGTAGCTCTTGATCCGGCAAACAAACCACC  
GCTGGTAGCGGTGGTTTTTTTTGTTTGCAAGCAGCAGATTACGCGCAGAAA  
AAAAGGATCTCAAGAAGATCCTTTGATCTTTTCTACGGGGTCTGACGCTCA  
GTGGAACGAAAACACTCACGTTAAGGGATTTTGGTCATGAGATTATCAAAAA  
GGATCTTACCTAGATCCTTTTAAATTAATAAATGAAGTTTTAAATCAATCT  
AAAGTATATATGAGTAAACTTGGTCTGACAGTTACCAATGCTTAATCAGT  
GAGGCACCTATCTCAGCGATCTGTCTATTTTCGTTTCATCCATAGTTGCCTGA  
CTCCCCGTCGTGTAGATAACTACGATACGGGAGGGCTTACCATCTGGCCC  
CAGTGCTGCAATGATACCGCGAGACCCACGCTCACCGGCTCCAGATTTAT  
CAGCAATAAACCAGCCAGCCGGAAGGGCCGAGCGCAGAAGTGGTCCTGC  
AACTTTATCCGCCTCCATCCAGTCTATTAATTGTTGCCGGAAGCTAGAGT  
AAGTAGTTCGCCAGTTAATAGTTTGCGCAACGTTGTTGCCATTGCTACAGG  
CATCGTGGTGTCACGCTCGTCGTTTTGGTATGGCTTCATTCAGCTCCGGTTC  
CCAACGATCAAGGCGAGTTACATGATCCCCATGTTGTGCAAAAAAGCGG  
TTAGCTCCTTCGGTCCCTCCGATCGTTGTCAGAAGTAAGTTGGCCGCAGTGT  
TATCACTCATGGTTATGGCAGCACTGCATAATTCTCTTACTGTCATGCCAT  
CCGTAAGATGCTTTTTCTGTGACTGGTGAGTACTCAACCAAGTCATTCTGAG  
AATAGTGTATGCGGCGACCGAGTTGCTCTTGCCCGGCGTCAATACGGGAT  
AATACCGCGCCACATAGCAGAACTTTAAAAGTGCTCATCATTGGAAAACG  
TTCTTCGGGGCGAAAACCTCTCAAGGATCTTACCGCTGTTGAGATCCAGTTC  
GATGTAACCCACTCGTGCACCCAACACTGATCTTCAGCATCTTTTACTTTTAC  
CAGCGTTTTCTGGGTGAGCAAAAACAGGAAGGCAAAATGCCGCAAAAAG  
GGAATAAGGGCGACACGGAAATGTTGAATACTCATACTCTTCCTTTTTCA

ATATTATTGAAGCATTATCAGGGTTATTGTCTCATGAGCGGATACATATT  
TGAATGTATTTAGAAAAATAAACAAATAGGGGTTCCGCGCACATTTCCCC  
GAAAAGTGCCACCTGAC

Substrates were amplified using the Recombination A primer set in Supplemental  
Table S2

## EXPRESSION CONSTRUCTS

pET28a-EndoG

TGGCGAATGGGACGCGCCCTGTAGCGGCGCATTAAAGCGCGGCGGGTGTGG  
TGTTACGCGCAGCGTGACCGCTACACTTGCCAGCGCCCTAGCGCCCGCT  
CCTTTCGCTTTCTTCCCTTCTTTCTCGCCACGTTCCGCCGCTTTCCCCGTC  
AAGCTCTAAATCGGGGGCTCCCTTTAGGGTTCGATTTAGTGCTTTACGGC  
ACCTCGACCCCAAAAACTTGATTAGGGTGATGGTTCACGTAGTGGGCCA  
TCGCCCTGATAGACGGTTTTTCGCCCTTTGACGTTGGAGTCCACGTTCTTT  
AATAGTGGACTCTTGTTCAAACTGGAACAACACTCAACCCTATCTCGGTC  
TATTCTTTTGATTTATAAGGGATTTTGCCGATTTCCGGCCTATTGGTTAAAA  
AATGAGCTGATTTAACAAAAATTTAACGCGAATTTTAACAAAATATTAAC  
GTTTACAATTTTCAGGTGGCACTTTTCGGGGAAATGTGCGCGGAACCCCTAT  
TTGTTTATTTTTCTAAATACATTCAAATATGTATCCGCTCATGAATTAATTC  
TTAGAAAAACTCATCGAGCATCAAATGAAACTGCAATTTATTCATATCAG  
GATTATCAATACCATATTTTTGAAAAAGCCGTTTCTGTAATGAAGGAGAA  
AACTCACCGAGGCAGTTCATAGGATGGCAAGATCCTGGTATCGGTCTGC  
GATTCCGACTCGTCCAACATCAATACAACCTATTAATTTCCCTCGTCAAA  
AATAAGTTATCAAGTGAGAAATCACCATGAGTGACGACTGAATCCGGTG  
AGAATGGCAAAAAGTTTATGCATTTCTTTCCAGACTTGTTC AACAGGCCAGC  
CATTACGCTCGTCATCAAAATCACTCGCATCAACCAAACCGTTATTCATTC  
GTGATTGCGCCTGAGCGAGACGAAATACGCGATCGCTGTTAAAAGGACAA  
TTACAAACAGGAATCGAATGCAACCGGCGCAGGAACACTGCCAGCGCAT  
CAACAATATTTTCACCTGAATCAGGATATTCTTCTAATACCTGGAATGCTG  
TTTTCCCGGGGATCGCAGTGGTGAGTAACCATGCATCATCAGGAGTACGG  
ATAAAATGCTTGATGGTCGGAAGAGGCATAAATTCCGTCAGCCAGTTTAG  
TCTGACCATCTCATCTGTAACATCATTGGCAACGCTACCTTTGCCATGTTT  
CAGAAACA ACTCTGGCGCATCGGGCTTCCCATACAATCGATAGATTGTGCG  
CACCTGATTGCCCGACATTATCGCGAGCCATTTATACCCATATAAATCAG  
CATCCATGTTGGAATTTAATCGCGGCCTAGAGCAAGACGTTTCCCGTTGA  
ATATGGCTCATAACACCCCTTGTATTACTGTTTATGTAAGCAGACAGTTTT  
ATTGTT CATGACCAAATCCCTTAACGTGAGTTTTTCGTTCCACTGAGCGTC  
AGACCCCGTAGAAAAGATCAAAGGATCTTCTTGAGATCCTTTTTTTCTGCG  
CGTAATCTGCTGCTTGCAAACAAAAAAACCACCGCTACCAGCGGTGGTTT  
GTTTGCCGGATCAAGAGCTACCAACTCTTTTTCCGAAGGTA ACTGGCTTCA  
GCAGAGCGCAGATACCAATACTGTCCTTCTAGTGTAGCCGTAGTTAGGC  
CACC ACTTCAAGA ACTCTGTAGCACCGCCTACATACTCGCTCTGCTAATC  
CTGTTACCAGTGGCTGCTGCCAGTGGCGATAAGTCGTGTCTTACCGGGTTG  
GACTCAAGACGATAGTTACCGGATAAGGCGCAGCGGTCCGGGCTGAACGG  
GGGGTTCGTGCACACAGCCAGCTTGGAGCGAACGACCTACACCGAACTG  
AGATACTACAGCGTGAGCTATGAGAAAGCGCCACGCTTCCCGAAGGGA  
GAAAGGCGGACAGGTATCCGGTAAGCGGCAGGGTTCGGAACAGGAGAGCG

CACGAGGGAGCTTCCAGGGGGAAACGCCTGGTATCTTTATAGTCCTGTTCG  
GGTTTCGCCACCTCTGACTTGAGCGTCGATTTTTGTGATGCTCGTCAGGGG  
GGCGGAGCCTATGGAAAAACGCCAGCAACGCGGCCTTTTTACGGTTCCTG  
GCCTTTTGCTGGCCTTTTGCTCACATGTTCTTCTGCGTTATCCCCTGATT  
CTGTGGATAACCGTATTACCGCCTTTGAGTGAGCTGATACCGCTCGCCGCA  
GCCGAACGACCGAGCGCAGCGAGTCAGTGAGCGAGGAAGCGGAAGAGCG  
CCTGATGCGGTATTTTCTCCTTACGCATCTGTGCGGTATTTACACACCGCAT  
ATATGGTGCACCTCTCAGTACAATCTGCTCTGATGCCGCATAGTTAAGCCAG  
TATACTCCGCTATCGCTACGTGACTGGGTCATGGCTGCGCCCCGACACC  
CGCCAACACCCGCTGACGCGCCCTGACGGGCTTGTCTGCTCCCGGCATCC  
GCTTACAGACAAGCTGTGACCGTCTCCGGGAGCTGCATGTGTGTCAGAGGTT  
TTCACCGTCATCACCGAAACGCGCGAGGCAGCTGCGGTAAGCTCATCAG  
CGTGGTTCGTGAAGCGATTACAGATGTCTGCCTGTTTCATCCGCGTCCAGCT  
CGTTGAGTTTCTCCAGAAGCGTTAATGTCTGGCTTCTGATAAAGCGGGCCA  
TGTTAAGGGCGGTTTTTCTGTTTGGTCACTGATGCCTCCGTGTAAGGGG  
GATTTCTGTTTCATGGGGGTAATGATACCGATGAAACGAGAGAGGATGCTC  
ACGATACGGGTTACTGATGATGAACATGCCCGTTACTGGAACGTTGTGA  
GGGTAAACAACCTGGCGGTATGGATGCGGGCGGACCAGAGAAAAATCACT  
CAGGGTCAATGCCAGCGCTTCGTTAATACAGATGTAGGTGTTCCACAGGG  
TAGCCAGCAGCATCCTGCGATGCAGATCCGGAACATAATGGTGCAGGGCG  
CTGACTTCCGCGTTTCCAGACTTTACGAAACACGGAAACCGAAGACCATT  
CATGTTGTTGCTCAGGTCGCAGACGTTTTGTCAGCAGCAGTCGCTTCACGTT  
CGCTCGCGTATCGGTGATTCATTCTGCTAACCAGTAAGGCAACCCCGCCA  
GCCTAGCCGGGTCCTCAACGACAGGAGCACGATCATGCGCACCCGTGGGG  
CCGCCATGCCGGCGATAATGGCCTGTTCTCGCCGAAACGTTTGGTGGCG  
GGACCAGTGACGAAGGCTTGAGCGAGGGCGTGCAAGATTCCGAATACCG  
CAAGCGACAGGCCGATCATCGTCGCGCTCCAGCGAAAGCGGTCCCTCGCCG  
AAAATGACCCAGAGCGCTGCCGGCACCTGTCTACGAGTTGCATGATAAA  
GAAGACAGTCATAAGTGCGGCGACGATAGTCATGCCCCGCGCCCACCGGA  
AGGAGCTGACTGGGTTGAAGGCTCTCAAGGGCATCGGTGAGATCCCGGT  
GCCTAATGAGTGAGCTAACTTACATTAATTGCGTTGCGCTCACTGCCCGCT  
TTCCAGTCGGGAAACCTGTGCTGCCAGCTGCATTAATGAATCGGCCAACG  
CGCGGGGAGAGGGCGGTTTTCGTAATTGGGCGCCAGGGTGGTTTTTCTTTTCA  
CCAGTGAGACGGGCAACAGCTGATTGCCCTTACCGCCTGGCCCTGAGAG  
AGTTGCAGCAAGCGGTCCACGCTGGTTTGGCCCAGCAGGCGAAAATCCTG  
TTTGATGGTGGTTAACGGCGGGATATAACATGAGCTGTCTTCGGTATCGTC  
GTATCCCACTACCGAGATATCCGCACCAACGCGCAGCCCAGACTCGGTAA  
TGCGCGCATTGCGCCCAGCGCCATCTGATCGTTGGCAACCAGCATCGCA  
GTGGGAACGATGCCCTCATTACGATTTGCATGGTTTGTGAAAACCGGA  
CATGGCACTCCAGTCGCCTTCCCGTTCGCTATCGGCTGAATTTGATTGCG  
AGTGAGATATTTATGCCAGCCAGCCAGACGCAGACGCGCCGAGACAGAA  
CTTAATGGGCCCGCTAACAGCGCGATTTGCTGGTGACCCAATGCGACCAG  
ATGCTCCACGCCAGTCGCGTACCGTCTTCATGGGAGAAAATAATACTGT  
TGATGGGTGTCTGGTCAGAGACATCAAGAAATAACGCCGGAACATTAGTG  
CAGGCAGCTTCCACAGCAATGGCATCCTGGTCATCCAGCGGATAGTTAAT  
GATCAGCCCAGTACGCGTTCGCGGAGAAGATTGTGCACCGCCGCTTTAC  
AGGCTTCGACGCCGCTTCGTTCTACCATCGACACCACCAGCTGGCACCC  
AGTTGATCGGCGCGAGATTTAATCGCCGCGACAATTTGCGACGGCGCGTG  
CAGGGCCAGACTGGAGGTGGCAACGCCAATCAGCAACGACTGTTTGGCCG  
CCAGTTGTTGTGCCACGCGGTTGGGAATGTAATTCAGCTCCGCCATCGCCG



CTTCCACTTTTTCCCGCGTTTTTCGCAGAAACGTGGCTGGCCTGGTTCACCA  
CGCGGGAAACGGTCTGATAAGAGACACCGGCATACTCTGCGACATCGTAT  
AACGTTACTGGTTTCACATTCACCACCCTGAATTGACTCTCTTCCGGGCGC  
TATCATGCCATAACCGCGAAAGGTTTTGCGCCATTCGATGGTGTCCGGGATC  
TCGACGCTCTCCCTTATGCGACTCCTGCATTAGGAAGCAGCCCAGTAGTA  
GGTTGAGGCCGTTGAGCACCCGCCGCCGAAGGAATGGTGCATGCAAGGA  
GATGGCGCCCAACAGTCCCCCGGCCACGGGGCCTGCCACCATACCCACGC  
CGAAACAAGCGCTCATGAGCCCGAAGTGGCGAGCCCGATCTTCCCATCG  
GTGATGTCGGCGATATAGGCGCCAGCAACCGCACCTGTGGCGCCGGTGAT  
GCCGGCCACGATGCGTCCGGCGTAGAGGATCGAGATCTCGATCCCGCGAA  
ATTAATACGACTCACTATAGGGGAATTGTGAGCGGATAACAATCCCCTC  
TAGAAATAATTTTGTTTAACTTTAAGAAGGAGATATACCATGGGCAGCAG  
CCATCATCATCATCACAGCAGCGGCCTGGTGCCGCGCGGCAGCCAT  
ATGCGCGCGCTGCGGGCCGGCCTGACCCTAGCGCTGGGCGCGGGGCTGGG  
CGCCGCGGCAGAGCATTGGCGGCGGGAGGGCAAAGCGCCGGGGCTG  
CTGGGCCGAGTGCCATTGTTGCCGGTGGTTCGCGGCCGATCTTCCCGCGCTG  
CCGGGGGGACCGGCGGGCGGCACCGGGGAACTGGCCAAGTACGGGCTGC  
CCGGCGTGGCGCAGCTCCGGAGCCGCGAGTCTACGTGCTTAGCTACGAC  
CCGCGCACGCGCGGTGCGCTCTGGGTGTTGGAGCAGCTGAGGCCAGAGCG  
GCTCCGTGGCGACGGGGACCGTAGCGCCTGCGACTTCCGCGAGGATGACT  
CTGTGCACGCGTACCACCGCGCCACCAATGCGGACTACCGCGGCAGTGGC  
TTTGACCGCGGCCATTTGGCCGCCGCCCAACCACCGCTGGAGTCAGCG  
GGCCATGGACGACACCTTCTACCTGAGCAACGTAGCGCCTCAGGTGCCAC  
ACCTCAACCAGAATGCCTGGAACAACCTTGAGAGGTACAGCCGCAGCTTG  
ACGCGAACTTACCAAAATGTCTATGTCTGCACGGGGCCGCTTTTCCCTGCC  
AGGACCGAGGCTGATGGGAAGTCCTATGTGAAGTACCAGGTTATTGGGAA  
GAACCACGTGGCAGTGCCACACACTTCTTCAAGGTGCTGATCCTGGAGG  
CAGCCGGTGGGCAGATCGAGCTACGTTCTACGTGATGCCCAATGCCCC  
GTGGATGAGACCATCCCTCTGGAGCGGTTCTTGGTGCCCATCGAGAGCAT  
CGAGCGGGCCTCGGGATTGCTCTTCGTGCCCAATATTCTGGCTCGAGCTGG  
AAACCTCAAGGCTATCACTGCTGGCAGCAAGTGAGCGGCCGCACTCGAGC  
ACCACCACCACCACCTGAGATCCGGCTGCTAACAAAGCCCGAAAGGA  
AGCTGAGTTGGCTGCTGCCACCGCTGAGCAATAACTAGCATAACCCCTTG  
GGCCTCTAAACGGGTCTTGAGGGGTTTTTTGCTGAAAGGAGGAACTATA  
TCCGGAT

pET28a-EndoG H128A

TGGCGAATGGGACGCGCCCTGTAGCGGCGCATTAAGCGCGGGCGGGTGTGG  
TGGTTACGCGCAGCGTGACCGCTACACTTGCCAGCGCCCTAGCGCCCGCT  
CCTTTCGCTTTCTTCCCTTCTTCTCGCCACGTTCCGCCGGCTTTCCCCGTC  
AAGCTCTAAATCGGGGGCTCCCTTTAGGGTTCGATTTAGTGCTTTACGGC  
ACCTCGACCCCAAAAACTTGATTAGGGTGATGGTTCACGTAGTGGGCCA  
TCGCCCTGATAGACGGTTTTTTCGCCCTTTGACGTTGGAGTCCACGTTCTTT  
AATAGTGGACTCTTGTTCCAAACTGGAACAACACTCAACCCTATCTCGGTC  
TATTCTTTTGATTTATAAGGGATTTTGCCGATTTTCGGCCTATTGGTTAAAA  
AATGAGCTGATTTAACAAAAATTTAACGCGAATTTTAACAAAATATTAAC  
GTTTACAATTCAGGTGGCACTTTTCGGGGAAATGTGCGCGGAACCCCTAT

TTGTTTATTTTTCTAAATACATTCAAATATGTATCCGCTCATGAATTAATTC  
TTAGAAAACTCATCGAGCATCAAATGAACTGCAATTTATTCATATCAG  
GATTATCAATACCATATTTTTGAAAAAGCCGTTTCTGTAATGAAGGAGAA  
AACTCACCGAGGCAGTTCCATAGGATGGCAAGATCCTGGTATCGGTCTGC  
GATTCCGACTCGTCCAACATCAATAACAACCTATTAATTTCCCCTCGTCAAA  
AATAAGGTTATCAAGTGAGAAATCACCATGAGTGACGACTGAATCCGGTG  
AGAATGGCAAAAAGTTTATGCATTTCTTTCCAGACTTGTTCAACAGGCCAGC  
CATTACGCTCGTCATCAAAATCACTCGCATCAACCAAACCGTTATTCATTC  
GTGATTGCGCCTGAGCGAGACGAAATACGCGATCGCTGTTAAAAGGACAA  
TTACAAACAGGAATCGAATGCAACCGGCGCAGGAACACTGCCAGCGCAT  
CAACAATATTTTACCTGAATCAGGATATTCTTCTAATACCTGGAATGCTG  
TTTTCCCGGGGATCGCAGTGGTGAGTAACCATGCATCATCAGGAGTACGG  
ATAAAATGCTTGATGGTCGGAAGAGGCATAAATTCCGTCAGCCAGTTTAG  
TCTGACCATCTCATCTGTAACATCATTGGCAACGCTACCTTTGCCATGTTT  
CAGAAACAACCTCTGGCGCATCGGGCTTCCCATACAATCGATAGATTGTGC  
CACCTGATTGCCCGACATTATCGCGAGCCCATTTATACCCATATAAATCAG  
CATCCATGTTGGAATTTAATCGCGGCCTAGAGCAAGACGTTTCCCCTTGA  
ATATGGCTCATAACACCCCTTGTATTACTGTTTATGTAAGCAGACAGTTTT  
ATTGTTTATGACCAAATCCCTTAACGTGAGTTTTTCGTTCCACTGAGCGTC  
AGACCCCGTAGAAAAGATCAAAGGATCTTCTTGAGATCCTTTTTTTCTGCG  
CGTAATCTGCTGCTTGCAAACAAAAAAACCACCGCTACCAGCGGTGGTTT  
GTTTGCCGGATCAAGAGCTACCAACTCTTTTTCCGAAGGTAAGTGGCTTCA  
GCAGAGCGCAGATACCAAATACTGTCCTTCTAGTGTAGCCGTAGTTAGGC  
CACCCTTCAAGAATCTGTAGCACCGCCTACATACCTCGCTCTGCTAATC  
CTGTTACCAGTGGCTGCTGCCAGTGGCGATAAGTCGTGTCTTACCGGGTTG  
GACTCAAGACGATAGTTACCGGATAAGGCGCAGCGGTCCGGGCTGAACGG  
GGGGTTCGTGCACACAGCCCAGCTTGGAGCGAACGACCTACACCGAACTG  
AGATACCTACAGCGTGAGCTATGAGAAAGCGCCACGCTTCCCGAAGGGA  
GAAAGGCGGACAGGTATCCGGTAAGCGGCAGGGTTCGGAACAGGAGAGCG  
CACGAGGGAGCTTCCAGGGGGAAACGCCTGGTATCTTTATAGTCCTGTGCG  
GGTTTCGCCACCTCTGACTTGAGCGTCGATTTTTGTGATGCTCGTCAGGGG  
GGCGGAGCCTATGGAAAACGCCAGCAACGCGGCCTTTTTACGGTTCTG  
GCCTTTTGCTGGCCTTTTGCTCACATGTTCTTTCCTGCGTTATCCCCTGATT  
CTGTGGATAACCGTATTACCGCCTTTGAGTGAGCTGATACCGCTCGCCGCA  
GCCGAACGACCGAGCGCAGCGAGTCAAGTCAAGTCAAGTCAAGTCAAGTCAAG  
CCTGATGCGGTATTTTCTCCTTACGCATCTGTGCGGTATTTACACCCGCAT  
ATATGGTGCACCTCTCAGTACAATCTGCTCTGATGCCGCATAGTTAAGCCAG  
TATACTCCGCTATCGCTACGTGACTGGGTCATGGCTGCGCCCCGACACC  
CGCAAACACCCGCTGACGCGCCCTGACGGGCTTGTCTGCTCCCGGCATCC  
GCTTACAGACAAGCTGTGACCGTCTCCGGGAGCTGCATGTGTGTCAGAGGTT  
TTCACCGTCATCACCGAAACGCGCGAGGCAGCTGCGGTAAGCTCATCAG  
CGTGGTTCGTGAAGCGATTACAGATGTCTGCCTGTTTATCCGCGTCCAGCT  
CGTTGAGTTTCTCCAGAAGCGTTAATGTCTGGCTTCTGATAAAGCGGGCCA  
TGTTAAGGGCGGTTTTTTCTGTTTGGTCACTGATGCCTCCGTGTAAGGGG  
GATTTCTGTTTATGGGGGTAATGATACCGATGAAACGAGAGAGGATGCTC  
ACGATACGGGTTACTGATGATGAACATGCCCGGTTACTGGAACGTTGTGA  
GGGTAAACAACCTGGCGGTATGGATGCGGGCGGACCAGAGAAAAATCACT  
CAGGGTCAATGCCAGCGCTTCGTTAATACAGATGTAGGTGTTCCACAGGG  
TAGCCAGCAGCATCCTGCGATGCAGATCCGGAACATAATGGTGCAGGGCG  
CTGACTTCCGCGTTTCCAGACTTTACGAAACACGGAAACCGAAGACCATT

CATGTTGTTGCTCAGGTCGCAGACGTTTTGCAGCAGCAGTCGCTTCACGTT  
CGCTCGCGTATCGGTGATTCACTTCTGCTAACCAGTAAGGCAACCCCGCCA  
GCCTAGCCGGGTCCTCAACGACAGGAGCACGATCATGCGCACCCGTGGGG  
CCGCCATGCCGGCGATAATGGCCTGCTTCTCGCCGAAACGTTTGGTGGCG  
GGACCAGTGACGAAGGCTTGAGCGAGGGCGTGCAAGATTCCGAATACCG  
CAAGCGACAGGCCGATCATCGTCGCGCTCCAGCGAAAGCGGTCCCTCGCCG  
AAAATGACCCAGAGCGCTGCCGGCACCTGTCCTACGAGTTGCATGATAAA  
GAAGACAGTCATAAGTGCGGGCAGGATAGTCATGCCCCGCGCCACCGGA  
AGGAGCTGACTGGGTTGAAGGCTCTCAAGGGCATCGGTGAGATCCCGGT  
GCCTAATGAGTGAGCTAACTTACATTAATTGCGTTGCGCTCACTGCCCGCT  
TTCCAGTCGGGAAACCTGTGCTGCCAGCTGCATTAATGAATCGGCCAACG  
CGCGGGGAGAGGGCGTTTTCGTATTGGGCGCCAGGGTGGTTTTTCTTTTCA  
CCAGTGAGACGGGCAACAGCTGATTGCCCTTCACCGCCTGGCCCTGAGAG  
AGTTGCAGCAAGCGGTCCACGCTGGTTTGCCCCAGCAGGGCGAAAATCCTG  
TTTGATGGTGGTTAACGGCGGGATATAACATGAGCTGTCTTCGGTATCGTC  
GTATCCCCTACCGAGATATCCGCACCAACGCGCAGCCCGGACTCGGTAA  
TGGCGCGCATTGCGCCAGCGCCATCTGATCGTTGGCAACCAGCATCGCA  
GTGGGAACGATGCCCTCATTACGATTTGCATGGTTTGGTAAAACCGGA  
CATGGCACTCCAGTCGCCTTCCCGTTCGCTATCGGCTGAATTTGATTGCG  
AGTGAGATATTTATGCCAGCCAGCCAGACGCGCAGACGCGCCGAGACAGAA  
CTTAATGGGCCCCGCTAACAGCGCGATTTGCTGGTGACCCAATGCGACCAG  
ATGCTCCACGCCAGTCGCGTACCGTCTTCATGGGAGAAAATAATACTGT  
TGATGGGTGTCTGGTCAGAGACATCAAGAAATAACGCCGGAACATTAGTG  
CAGGCAGCTTCCACAGCAATGGCATCCTGGTCATCCAGCGGATAGTTAAT  
GATCAGCCCCTGACGCGTTGCGCGAGAAGATTGTGCACCGCCGCTTTAC  
AGGCTTCGACGCCGCTTCGTTCTACCATCGACACCACCACGCTGGCACCC  
AGTTGATCGGCGCGAGATTTAATCGCCGCGACAATTTGCGACGGCGCGTG  
CAGGGCCAGACTGGAGGTGGCAACGCCAATCAGCAACGACTGTTTGGCCG  
CCAGTTGTTGTGCCACGCGGTTGGGAATGTAATTCAGCTCCGCCATCGCCG  
CTTCCACTTTTTCCCGCGTTTTTCGCAGAAACGTGGCTGGCCTGGTTCACCA  
CGCGGGAAACGGTCTGATAAGAGACACCGGCATACTCTGCGACATCGTAT  
AACGTTACTGGTTTCACATTCACCACCCTGAATTGACTCTCTTCCGGGCGC  
TATCATGCCATAACCGCGAAAGGTTTTGCGCCATTCGATGGTGTCCGGGATC  
TCGACGCTCTCCCTTATGCGACTCCTGCATTAGGAAGCAGCCAGTAGTA  
GGTTGAGGCCGTTGAGCACCGCCGCGCAAGGAATGGTGCATGCAAGGA  
GATGGCGCCCAACAGTCCCCCGGCCACGGGGCCTGCCACCATAACCCACGC  
CGAAACAAGCGCTCATGAGCCCAGAGTGGCGAGCCCGATCTTCCCATCG  
GTGATGTGCGCGATATAGGCGCCAGCAACCGCACCTGTGGCGCCGGTGAT  
GCCGGCCACGATGCGTCCGGCGTAGAGGATCGAGATCTCGATCCCGCGAA  
ATTAATACGACTCACTATAGGGGAATTGTGAGCGGATAACAATCCCCTC  
TAGAAATAATTTTGTTTAACTTTAAGAAGGAGATATAACCATGGGCAGCAG  
CCATCATCATCATCACAGCAGCGGCCTGGTGCCGCGCGGCAGCCAT  
ATGCGCGCGCTGCGGGCCGGCCTGACCCTAGCGCTGGGCGCGGGGCTGGG  
CGCCGCGGCAGAGCATTGGCGGGCGGGAGGGCAAAGCGCCGGGGCTG  
CTGGGCCGAGTGCCATTGTTGCCGGTGGTTCGCGGCCGATCTTCCCGCGCTG  
CCGGGGGGACCGGCCGGGCGGCACCGGGGAACTGGCCAAGTACGGGCTGC  
CCGGCGTGGCGCAGCTCCGGAGCCGCGAGTCTACGTGCTTAGCTACGAC  
CCGCGCACGCGCGGTGCGCTCTGGGTGTTGGAGCAGCTGAGGCCAGAGCG  
GCTCCGTGGCGACGGGGACCGTAGCGCCTGCGACTTCCGCGAGGATGACT  
CTGTGCACGCGTACCACCGCGCCACCAATGCGGACTACCGCGGCAGTGGC

TTTGACCGCGGCGCTTTGGCCGCCGCCGCAACCACCGCTGGAGTCAGCG  
GGCCATGGACGACACCTTCTACCTGAGCAACGTAGCGCCTCAGGTGCCAC  
ACCTCAACCAGAATGCCTGGAACAACCTTGAGAGGTACAGCCGCAGCTTG  
ACGCGAACTTACCAAATGTCTATGTCTGCACGGGGCCGCTTTTCTGCC  
AGGACCGAGGCTGATGGGAAGTCTATGTGAAGTACCAGGTTATTGGGAA  
GAACCACGTGGCAGTGCCACACACTTCTTCAAGGTGCTGATCCTGGAGG  
CAGCCGGTGGGCAGATCGAGCTACGTTCTACGTGATGCCCAATGCCCC  
GTGGATGAGACCATCCCTCTGGAGCGGTTCTGGTGCCCATCGAGAGCAT  
CGAGCGGGCCTCGGGATTGCTCTTCGTGCCCAATATTCTGGCTCGAGCTGG  
AAACCTCAAGGCTATCACTGCTGGCAGCAAGTGAGCGGCCGCACTCGAGC  
ACCACCACCACCACCTGAGATCCGGCTGCTAACAAAGCCCGAAAGGA  
AGCTGAGTTGGCTGCTGCCACCGCTGAGCAATAACTAGCATAACCCCTTG  
GGCCTCTAAACGGGTCTTGAGGGGTTTTTTGCTGAAAGGAGGAACTATA  
TCCGGAT

pET28a-EndoGI

ATCCGGATATAGTTCCTCCTTTCAGCAAAAAACCCCTCAAGACCCGTTTAG  
AGGCCCAAGGGGTTATGCTAGTTATTGCTCAGCGGTGGCAGCAGCCAAC  
TCAGCTTCCTTTCGGGCTTTGTTAGCAGCCGGATCTCAGTGGTGGTGGTGG  
TGGTGCTCGAGTGCGGCCGCTAATCATCATTTACAGGTCCTTCAAAGGG  
AGCCTTGCAACCAGCCTTTTCGTAAACTCGAATGGCAGCGGATCCTCGT  
GTCGTAATAGTCGGAATCGCGGGCGCAACTGGGACCAAGTTCCATTTTCA  
CCATCTTGTCGCGCCAAAAGTCGAGAAGCTCTTTGGTGAGAACCTCATCC  
CTCAGATTGAAAATCCAAGTGTGTAGTCGTCGGGCCCATAGAAACCAGC  
ATCACCTTGTACTCCTGCAGCAGCTCGGCGGCCTTGTTTTGATCCTCCGC  
TGAGGGTGTGCCATCGAAGAGCAGCTTCCAGATTATCTCCCTGGCGGCTG  
CCGCTATCTTCTCACGCTGGCCTGGTGAACGCTGTCCGGAACGATGATTT  
TGGTCAGAACAAAGCGCTTCATTAGAGTTCGGTATTCCTCGAGCGGATTTT  
CCTTGGTCAGGGTGGCCTCAAATTCGCCAGACAGAGCGGCGGCATCATCG  
GCACTCAGTTCACCCGGAGTTGTAGGCGTCGCTGGCCATCCTGATCCAG  
CGAAGCCTGCTCCTCGAGTGCTGCGCGCACCTTTAAGCTGGCTGCAAATG  
GAGCGGTACAACCGGCATGGGCATAGAACTCCAATGGCGGGGTGTCGTCG  
CTGTCAAAGAGATCACTGTCGCGTGACCAACAGGGACCGAGTTGCTTCTT  
CACCAGCACATCGCGCCAAAAGTCGAGGAGTTCCTTCTTTAGAACCTCAT  
CCCTCAGCTTGACAATCCATTCGTTGTACGGCGTCGGGTCGTAGAAGCAG  
GCGTCACCACGGTATTCCTCCAGCAATTGGCTGGCCTTCTCTGTGTTTCGAT  
TGCGAGGTACCGGCCTCGTCGAATAACAGCCGCCAGATGACGTCACGCGC  
CGCTGCAGCCGTTTCGATCGAAATTCTCCTTGGTGACATCATCATCCACGAT  
TTCGTCTACCTGCACGCGTGTTTCGATAAGCTTTTGGTAATCCTTAACGGG  
ATCCACCAGGCCAATGGTGTAAATCGTTCTGTGCTACTTTCTCGGCCGTTGC  
CATTTTGTTCGGATTGTGTGTCCTCGGCCTTGCCTTGGACATATGGCTGCC  
GCGCGGCACCAGGCCGCTGCTGTGATGATGATGATGATGGCTGCTGCCCA  
TGGTATATCTCCTTCTTAAAGTTAAACAAAATTATTTCTAGAGGGGAATTG  
TTATCCGCTCACAATCCCCTATAGTGAGTCGTATTAATTTTCGCGGGATCG  
AGATCTCGATCCTCTACGCCGGACGCATCGTGGCCGGCATCACCGGCGCC  
ACAGGTGCGGTTGCTGGCGCCTATATCGCCGACATCACCGATGGGGAAGA  
TCGGGCTCGCCACTTCGGGCTCATGAGCGCTTGTTTCGGCGTGGGTATGGT  
GGCAGGCCCCGTGGCCGGGGGACTGTTGGGCGCCATCTCCTTGCATGCAC  
CATTCCTTGCGGCGGCGGTGCTCAACGGCCTAACCTACTACTGGGCTGCT

TCCTAATGCAGGAGTCGCATAAGGGAGAGCGTCGAGATCCCGGACACCAT  
CGAATGGCGCAAACCTTTCGCGGTATGGCATGATAGCGCCCGGAAGAGA  
GTCAATTCAGGGTGGTGAATGTGAAACCAGTAACGTTATACGATGTTCGA  
GAGTATGCCGGTGTCTTATCAGACCGTTTCCCGCGTGGTGAACCAGGCC  
AGCCACGTTTCTGCGAAAACGCGGGAAAAAGTGGAAGCGGCGATGGCGG  
AGCTGAATTACATTCCCAACCGCGTGGCACAACAACCTGGCGGGCAAACAG  
TCGTTGCTGATTGGCGTTGCCACCTCCAGTCTGGCCCTGCACGCGCCGTCG  
CAAATTGTCGCGGCGATTAAATCTCGCGCCGATCAACTGGGTGCCAGCGT  
GGTGGTGTGATGGTAGAACGAAGCGGCGTGAAGCCTGTAAAGCGGCG  
GTGCACAATCTTCTCGCGAACGCGTCAGTGGGCTGATCATTAACTATCCG  
CTGGATGACCAGGATGCCATTGCTGTGGAAGCTGCCTGCACTAATGTTCC  
GGCGTTATTTCTTGATGTCTCTGACCAGACACCCATCAACAGTATTATTT  
CTCCCATGAAGACGGTACGCGACTGGGCGTGGAGCATCTGGTTCGATTGG  
GTCACCAGCAAATCGCGCTGTTAGCGGGCCATTAAGTTCTGTCTCGGCG  
CGTCTGCGTCTGGCTGGCTGGCATAAATATCTCACTCGCAATCAAATTCAG  
CCGATAGCGGAACGGGAAGGCGACTGGAGTGCCATGTCCGGTTTTCAACA  
AACCATGCAAATGCTGAATGAGGGCATCGTTCCCACTGCGATGCTGGTTG  
CCAACGATCAGATGGCGCTGGGCGCAATGCGCGCCATTACCGAGTCCGGG  
CTGCGCGTTGGTGCGGATATCTCGGTAGTGGGATACGACGATACCGAAGA  
CAGCTCATGTTATATCCCGCCGTTAACACCATCAAACAGGATTTTCGCCT  
GCTGGGGCAAACCAGCGTGGACCGCTTGCTGCAACTCTCTCAGGGCCAGG  
CGGTGAAGGGCAATCAGCTGTTGCCCGTCTCACTGGTGAAAAGAAAAACC  
ACCCTGGCGCCAATACGCAAACCGCCTCTCCCCGCGCGTTGGCCGATTC  
ATTAATGCAGCTGGCACGACAGGTTTCCCGACTGGAAAGCGGGCAGTGAG  
CGCAACGCAATTAATGTAAGTTAGCTCACTCATTAGGCACCGGGATCTCG  
ACCGATGCCCTTGAGAGCCTTCAACCCAGTCAGCTCCTTCCGGTGGGCGC  
GGGGCATGACTATCGTCGCCGCACTTATGACTGTCTTCTTTATCATGCAAC  
TCGTAGGACAGGTGCCGGCAGCGCTCTGGGTCATTTTTCGGCGAGGACCGC  
TTTCGCTGGAGCGCGACGATGATCGGCCTGTCGCTTGCGGTATTCGGAATC  
TTGCACGCCCTCGCTCAAGCCTTCGTCACTGGTCCCGCCACCAAACGTTTC  
GGCGAGAAGCAGGCCATTATCGCCGGCATGGCGGCCCCACGGGTGCGCAT  
GATCGTGCTCCTGTCGTTGAGGACCCGGCTAGGCTGGCGGGGTTGCCTTA  
CTGGTTAGCAGAAATGAATCACCGATACGCGAGCGAACGTGAAGCGACTGC  
TGCTGCAAAACGTCTGCGACCTGAGCAACAACATGAATGGTCTTCGGTTT  
CCGTGTTTCGTAAAGTCTGGAAACGCGGAAGTCAGCGCCCTGCACCATTA  
TGTTCCGGATCTGCATCGCAGGATGCTGCTGGCTACCCTGTGGAACACCTA  
CATCTGTATTAACGAAGCGCTGGCATTGACCCTGAGTGATTTTTCTCTGGT  
CCCGCCGCATCCATACCGCCAGTTGTTTACCCTCACAAACGTTCCAGTAACC  
GGGCATGTTTCATCATCAGTAACCCGTATCGTGAGCATCCTCTCTCGTTTCA  
TCGGTATCATTACCCCATGAACAGAAATCCCCCTTACACGGAGGCATCA  
GTGACCAAACAGGAAAAAACCGCCCTAACATGGCCCGCTTTATCAGAAG  
CCAGACATTAACGCTTCTGGAGAACTCAACGAGCTGGACGCGGATGAAC  
AGGCAGACATCTGTGAATCGCTTACGACCACGCTGATGAGCTTACC GC  
AGCTGCCTCGCGCGTTTCGGTGATGACGGTGAAAACCTCTGACACATGCA  
GCTCCCGGAGACGGTCACAGCTTGCTGTAAAGCGGATGCCGGGAGCAGAC  
AAGCCCGTCAGGGCGCGTCAGCGGGTGTGGCGGGTGTGGGGGCGCAGCC  
ATGACCCAGTCACGTAGCGATAGCGGAGTGTATACTGGCTTAACTATGCG  
GCATCAGAGCAGATTGTAAGTACTGAGAGTGCACCATATATGCGGTGTGAAATA  
CCGCACAGATGCGTAAGGAGAAAAATACCGCATCAGGCGCTTCCGCTTC  
CTCGCTCACTGACTCGCTGCGCTCGGTTCGGTTCGGTTCGGCGAGCGGTATC

AGCTCACTCAAAGGCGGTAATACGGTTATCCACAGAATCAGGGGATAACG  
CAGGAAAGAACATGTGAGCAAAAGGCCAGCAAAAGGCCAGGAACCGTAA  
AAAGGCCGCGTTGCTGGCGTTTTTCCATAGGCTCCGCCCCCTGACGAGC  
ATCACAAAAATCGACGCTCAAGTCAGAGGTGGCGAAACCCGACAGGACT  
ATAAAGATACCAGGCGTTTTCCCCTGGAAGCTCCCTCGTGCGCTCTCCTGT  
TCCGACCCTGCCGCTTACCGGATACCTGTCCGCTTTCTCCCTTCGGGAAG  
CGTGGCGCTTTCTCATAGCTCACGCTGTAGGTATCTCAGTTCGGTGTAGGT  
CGTTCGCTCCAAGCTGGGCTGTGTGCACGAACCCCCCGTTCAGCCCGACC  
GCTGCGCCTTATCCGGTAACTATCGTCTTGAGTCCAACCCGGTAAGACAC  
GACTTATCGCCACTGGCAGCAGCCACTGGTAACAGGATTAGCAGAGCGAG  
GTATGTAGGCGGTGCTACAGAGTTCTTGAAGTGGTGGCCTAACTACGGCT  
ACACTAGAAGGACAGTATTTGGTATCTGCGCTCTGCTGAAGCCAGTTACC  
TTCGGAAAAAGAGTTGGTAGCTCTTGATCCGGCAAACAAACCACCGCTGG  
TAGCGGTGGTTTTTTTTGTTTGCAAGCAGCAGATTACGCGCAGAAAAAAG  
GATCTCAAGAAGATCCTTTGATCTTTTCTACGGGGTCTGACGCTCAGTGG  
ACGAAAACCTCACGTTAAGGGATTTTGGTCATGAACAATAAACTGTCTGC  
TTACATAAACAGTAATACAAGGGGTGTTATGAGCCATATTCAACGGGAAA  
CGTCTTGCTCTAGGCCGCGATTAAATTCCAACATGGATGCTGATTTATATG  
GGTATAAATGGGCTCGCGATAATGTCGGGCAATCAGGTGCGACAATCTAT  
CGATTGTATGGGAAGCCCGATGCGCCAGAGTTGTTTCTGAAACATGGCAA  
AGGTAGCGTTGCCAATGATGTTACAGATGAGATGGTCAGACTAACTGGC  
TGACGGAATTTATGCCTCTTCCGACCATCAAGCATTTTATCCGTACTIONCTG  
ATGATGCATGGTACTCACCCTGCGATCCCCGGGAAAACAGCATTCCAG  
GTATTAGAAGAATATCCTGATTCAGGTGAAAATATTGTTGATGCGCTGGC  
AGTGTTCCCTGCGCCGGTTGCATTCGATTCCTGTTTGTAATTGTCCTTTAAC  
AGCGATCGCGTATTTTCGTCTCGCTCAGGCGCAATCACGAATGAATAACGG  
TTTGGTTGATGCGAGTGATTTTGTATGACGAGCGTAATGGCTGGCCTGTTGA  
ACAAGTCTGGAAAGAAATGCATAAACTTTTGCCATTCTCACCAGGATTCAG  
TCGTCACTCATGGTGATTTCTCACTTGATAACCTTATTTTTGACGAGGGGA  
AATTAATAGGTTGTATTGATGTTGGACGAGTCGGAATCGCAGACCGGATAC  
CAGGATCTTGCCATCCTATGGAACCTGCCTCGGTGAGTTTTCTCCTTCATTA  
CAGAAACGGCTTTTTCAAAAATATGGTATTGATAATCCTGATATGAATAA  
ATTGCAGTTTCATTTGATGCTCGATGAGTTTTTCTAAGAATTAATTCATGA  
GCGGATACATATTTGAATGTATTTAGAAAAATAAACAAATAGGGGTTCCG  
CGCACATTTCCCGAAAAGTGCCACCTGAAATTGTAAACGTTAATATTTTG  
TTAAAATTCGCGTTAAATTTTTGTTAAATCAGCTCATTTTTTTAACCAATAG  
GCCGAAATCGGCAAATCCCTTATAAATCAAAGAATAGACCGAGATAG  
GGTTGAGTGTTGTTCCAGTTTGGAACAAGAGTCCACTATTAAGAACGTG  
GACTCCAACGTCAAAGGGCGAAAAACCGTCTATCAGGGCGATGGCCCACT  
ACGTGAACCATACCCTAATCAAGTTTTTTGGGGTTCGAGGTGCCGTAAAG  
CACTAAATCGGAACCCTAAAGGGAGCCCCGATTTAGAGCTTGACGGGGA  
AAGCCGGCGAACGTGGCGAGAAAGGAAGGGAAGAAAGCGAAAGGAGCG  
GGCGCTAGGGCGCTGGCAAGTGTAGCGGTCACGCTGCGCGTAACCACCAC  
ACCCGCCGCGCTTAATGCGCCGCTACAGGGCGCGTCCCATTCGCCA

Supplemental Table S2

Primers to create substrates

|                                                    |                                                                               |
|----------------------------------------------------|-------------------------------------------------------------------------------|
| Amplify pUC19<br>pUC19 For<br>pUC19 Rev            | 5'-GGTACCCGGGGATCCTCTAGAGT-3'<br>5'-ACTCTAGAGGATCCCCGGGTACC-3'                |
| Amplify pCR2.1<br>pCR2.1 Amp For<br>pCR2.1 Amp Rev | 5'-TTGTCAGAAGTAAGTTGGTCGCAGTGTATC-3'<br>5'-GATAACACTGCGACCAACTTACTTCTGACAA-3' |
| Recombination A For<br>Recombination A Rev         | 5'-GATAACACTGCGACCAACTTACTTCTGACAA-3'<br>5'-TTGTCAGAAGTAAGTTGGTCGCAGTGTATC-3' |

qPCR Primers

|                                                                                                |                                                                    |
|------------------------------------------------------------------------------------------------|--------------------------------------------------------------------|
| Amplify Cut Region of pCR2.1 (Amplicon I)<br>Amplicon I For<br>Amplicon I Rev                  | 5'-GCTATGACCATGATTACGCCAAGC-3'<br>5'-TACGACTCACTATAGGGCGAATTGGG-3' |
| Uncut Control Region of pCR2.1 (Amplicon II)<br>Amplicon II For<br>Amplicon II Rev             | 5'-ATGGATATCTGCAGAATTCGCC-3'<br>5'-AGTGTGCTGGAATTCGCC-3'           |
| Recombination Assay Control Amplicon<br>Recombination Control For<br>Recombination Control Rev | 5'-AGCTTGCGCTAATCATGGTCA-3'<br>5'-GGGGAAACGCCTGGTATCTT-3'          |
| Recombination Assay Recombined Region<br>Recombined For<br>Recombined Rev                      | 5'-CGGTGAAAACCTCTGACACA-3'<br>5'-TGCAGGTCGACTCTAGAGGAT-3'          |

Oligonucleotides for assays

|                   |                                                        |
|-------------------|--------------------------------------------------------|
| Top Unmodified    | 5'-AGGGCTTACCATCTGGCCCCAGTGCTGCAATGATACCGCGAGACC-3'    |
| Bottom Unmodified | 5'-GGTCTCGCGGTATCATTGCAGCACTGGGGCCAGATGGTAAGCCCT-3'    |
| Top 5hmC pos 1    | 5'-AGGGCTTACCATCTGG5hmCCCCAGTGCTGCAATGATACCGCGAGACC-3' |
| Top 5hmC pos 2    | 5'-AGGGCTTACCATCTGGC5hmCCCAGTGCTGCAATGATACCGCGAGACC-3' |
| Top 5hmC pos 3    | 5'-AGGGCTTACCATCTGGCC5hmCCAGTGCTGCAATGATACCGCGAGACC-3' |
| Top 5hmC pos 4    | 5'-AGGGCTTACCATCTGGCCC5hmCAGTGCTGCAATGATACCGCGAGACC-3' |
| Bottom 5hmC pos 5 | 5'-GGTCTCGCGGTATCATTGCAGCACTGGGG5hmCCAGATGGTAAGCCCT-3' |
| Bottom 5hmC pos 6 | 5'-GGTCTCGCGGTATCATTGCAGCACTGGGGC5hmCAGATGGTAAGCCCT-3' |

Site Directed Mutagenesis Primers

|               |                                    |
|---------------|------------------------------------|
| EndoGH128AFor | 5'-CTTTGACCGCGCGCTTTGGCCGCCGCC-3'  |
| EndoGH128ARev | 5'-GGCGCGCGGCCAAAGCGCCGCGTCAAAG-3' |

Supplemental Table S3

| Gene ID   | Protein Name                                                                                   |
|-----------|------------------------------------------------------------------------------------------------|
| gi:49864  | alpha-actin (aa 40-375) [Mus musculus]                                                         |
| gi:50797  | unnamed protein product [Mus musculus]                                                         |
| gi:50814  | unnamed protein product [Mus musculus]                                                         |
| gi:50881  | ezrin [Mus musculus]                                                                           |
| gi:51263  | p68 RNA helicase [Mus musculus]                                                                |
| gi:52785  | unnamed protein product [Mus musculus]                                                         |
| gi:52787  | unnamed protein product [Mus musculus]                                                         |
| gi:52789  | unnamed protein product [Mus musculus]                                                         |
| gi:52865  | unnamed protein product [Mus musculus]                                                         |
| gi:52867  | lamin B2 [Mus musculus]                                                                        |
| gi:52869  | unnamed protein product [Mus musculus]                                                         |
| gi:54827  | immunoglobulin gamma 2b heavy chain [Mus musculus]                                             |
| gi:110434 | Ig kappa chain V region (G2a) - mouse                                                          |
| gi:116132 | CFAH_MOUSE RecName: Full=Complement factor H; AltName: Full=Protein beta-1-H; Flags: Precursor |
| gi:191765 | alpha-fetoprotein, partial [Mus musculus]                                                      |
| gi:192005 | apolipoprotein E, partial [Mus musculus]                                                       |
| gi:197102 | (V-J). Ig heavy chain V-region [Mus musculus]                                                  |
| gi:201725 | t complex polypeptide 1 [Mus musculus]                                                         |
| gi:220349 | C4 [Mus musculus]                                                                              |
| gi:226165 | beta hexosaminidase beta                                                                       |
| gi:227527 | Ig VH ICH2, anti-angiotensin II                                                                |
| gi:227530 | Ig VL ICH2, anti-angiotensin II                                                                |
| gi:228591 | lamin B2                                                                                       |
| gi:284921 | Ig light chain V region (clone 17s.83) - mouse (fragment)                                      |
| gi:309119 | C4b-binding protein precursor [Mus musculus]                                                   |
| gi:309319 | heat shock protein 70 cognate [Mus musculus]                                                   |
| gi:312005 | small nuclear ribonucleoprotein E [Mus musculus]                                               |
| gi:346859 | Ig kappa chain V region - mouse (fragment)                                                     |



|            |                                                                                                                    |
|------------|--------------------------------------------------------------------------------------------------------------------|
| gi:347839  | matricin [Mus musculus]                                                                                            |
| gi:398168  | keratin 2 epidermis [Mus musculus]                                                                                 |
| gi:460317  | chaperonin [Mus musculus]                                                                                          |
| gi:548879  | RSU1_MOUSE RecName: Full=Ras suppressor protein 1; Short=RSP-1; Short=Rsu-1                                        |
| gi:555835  | HMG CoA synthase, partial [Mus musculus]                                                                           |
| gi:556301  | elongation factor Tu [Mus musculus]                                                                                |
| gi:575667  | unnamed protein product [Mus musculus]                                                                             |
| gi:763157  | U1RNA-associated 70-kDa protein [Mus musculus]                                                                     |
| gi:793931  | tryptophan-2,3-dioxygenase [Mus musculus]                                                                          |
| gi:904215  | cytokeratin 15 [Mus musculus]                                                                                      |
| gi:1083440 | octamer-binding protein NonO - mouse                                                                               |
| gi:1125026 | 3-hydroxyacyl CoA dehydrogenase [Mus musculus]                                                                     |
| gi:1150880 | phospholipase C beta3 [Mus musculus]                                                                               |
| gi:1181242 | fibronectin [Mus musculus]                                                                                         |
| gi:1304155 | pokeweed agglutinin-binding protein [Mus musculus]                                                                 |
| gi:1438563 | SH3P9 [Mus musculus]                                                                                               |
| gi:1524165 | NfiC1B [Mus musculus]                                                                                              |
| gi:1526541 | 14-3-3 eta [Mus musculus]                                                                                          |
| gi:1685271 | RXR alpha 2 [Mus musculus]                                                                                         |
| gi:1772998 | C1 inhibitor [Mus musculus]                                                                                        |
| gi:1816635 | SRG3 [Mus musculus]                                                                                                |
| gi:2392474 | A Chain A, Trivalent Antibody Fragment                                                                             |
| gi:2465310 | DNA helicase II [Mus musculus]                                                                                     |
| gi:2497642 | CLC4F_MOUSE RecName: Full=C-type lectin domain family 4 member F                                                   |
| gi:2644957 | SA2 nuclear protein [Mus musculus]                                                                                 |
| gi:2739450 | integrin binding protein kinase [Mus musculus]                                                                     |
| gi:2773081 | sarcoplasmic reticulum Ca <sup>2+</sup> -ATPase [Mus musculus]                                                     |
| gi:2961456 | RNA helicase A [Mus musculus]                                                                                      |
| gi:3023934 | HDAC2_MOUSE RecName: Full=Histone deacetylase 2; Short=HD2; AltName: Full=YY1 transcription factor-binding protein |
| gi:3242657 | cysteinyl-tRNA synthetase [Mus musculus]                                                                           |

|            |                                                                                          |
|------------|------------------------------------------------------------------------------------------|
| gi:3329496 | heterogenous nuclear ribonucleoprotein U [Mus musculus]                                  |
| gi:3329498 | heterogenous nuclear ribonucleoprotein A2/B1 [Mus musculus]                              |
| gi:3834675 | interleukin enhancer binding factor 3 [Mus musculus]                                     |
| gi:4001805 | BAF53a [Mus musculus]                                                                    |
| gi:4159806 | type II keratin subunit protein [Mus musculus]                                           |
| gi:4388775 | radixin [Mus musculus]                                                                   |
| gi:4506005 | serine/threonine-protein phosphatase PP1-beta catalytic subunit isoform 1 [Homo sapiens] |
| gi:4507131 | small nuclear ribonucleoprotein F [Homo sapiens]                                         |
| gi:4590328 | AF087141_1 valyl-tRNA synthetase [Mus musculus]                                          |
| gi:4759158 | small nuclear ribonucleoprotein Sm D2 isoform 1 [Homo sapiens]                           |
| gi:4759160 | small nuclear ribonucleoprotein Sm D3 [Homo sapiens]                                     |
| gi:5020213 | AF149822_1 mitotic checkpoint protein BUB3 [Mus musculus]                                |
| gi:5031595 | actin-related protein 2/3 complex subunit 4 isoform a [Homo sapiens]                     |
| gi:5263198 | GARP45 [Mus musculus]                                                                    |
| gi:5295992 | chaperonin containing TCP-1 theta subunit [Mus musculus]                                 |
| gi:5453555 | GTP-binding nuclear protein Ran [Homo sapiens]                                           |
| gi:5689158 | Septin6 [Mus musculus]                                                                   |
| gi:5902663 | elongation factor 1-beta homolog [Mus musculus]                                          |
| gi:6009521 | p100 co-activator [Mus musculus]                                                         |
| gi:6671702 | T-complex protein 1 subunit epsilon [Mus musculus]                                       |
| gi:6678329 | protein-glutamine gamma-glutamyltransferase 2 [Mus musculus]                             |
| gi:6679647 | endonuclease G, mitochondrial precursor [Mus musculus]                                   |
| gi:6680748 | ATP synthase subunit alpha, mitochondrial precursor [Mus musculus]                       |
| gi:6753324 | T-complex protein 1 subunit zeta [Mus musculus]                                          |
| gi:6753738 | eukaryotic translation initiation factor 2 subunit 3, X-linked [Mus musculus]            |
| gi:6754222 | heterogeneous nuclear ribonucleoprotein A/B isoform 2 [Mus musculus]                     |
| gi:6754480 | keratin, type I cytoskeletal 13 [Mus musculus]                                           |
| gi:6754816 | septin-2 isoform a [Mus musculus]                                                        |
| gi:6754976 | peroxiredoxin-1 [Mus musculus]                                                           |
| gi:6755372 | 40S ribosomal protein S3 [Mus musculus]                                                  |

|             |                                                                                                              |
|-------------|--------------------------------------------------------------------------------------------------------------|
| gi:6755382  | ruvB-like 2 [Mus musculus]                                                                                   |
| gi:7021537  | U2 small nuclear ribonucleoprotein A' [Mus musculus]                                                         |
| gi:7329989  | nebulin [Mus musculus]                                                                                       |
| gi:7638398  | AF245658_1 epidermal keratin 10 [Mus musculus]                                                               |
| gi:8393544  | heterogeneous nuclear ribonucleoproteins C1/C2 isoform 1 [Mus musculus]                                      |
| gi:8393784  | septin-9 isoform c [Mus musculus]                                                                            |
| gi:8567342  | retinol dehydrogenase 7 precursor [Mus musculus]                                                             |
| gi:9055218  | pre-mRNA-processing factor 40 homolog A [Mus musculus]                                                       |
| gi:9506571  | eukaryotic translation initiation factor 2 subunit 1 [Rattus norvegicus]                                     |
| gi:9717245  | cytoplasmic dynein heavy chain [Mus musculus]                                                                |
| gi:9790069  | spliceosome RNA helicase Ddx39b [Mus musculus]                                                               |
| gi:9790141  | actin-related protein 2/3 complex subunit 3 [Mus musculus]                                                   |
| gi:9910294  | keratin, type II cytoskeletal 71 [Mus musculus]                                                              |
| gi:9957546  | AF179996_1 Sep2 [Mus musculus]                                                                               |
| gi:10181166 | SWI/SNF-related matrix-associated actin-dependent regulator of chromatin subfamily E member 1 [Mus musculus] |
| gi:10442545 | PTB-associated splicing factor [Mus musculus]                                                                |
| gi:11907833 | AF257474_1 betaine-homocysteine methyltransferase 2 [Mus musculus]                                           |
| gi:12835914 | unnamed protein product [Mus musculus]                                                                       |
| gi:12836375 | unnamed protein product [Mus musculus]                                                                       |
| gi:12841593 | unnamed protein product [Mus musculus]                                                                       |
| gi:12843914 | unnamed protein product [Mus musculus]                                                                       |
| gi:12845562 | unnamed protein product [Mus musculus]                                                                       |
| gi:12845960 | unnamed protein product [Mus musculus]                                                                       |
| gi:12847801 | unnamed protein product [Mus musculus]                                                                       |
| gi:12848426 | unnamed protein product [Mus musculus]                                                                       |
| gi:12851426 | unnamed protein product [Mus musculus]                                                                       |
| gi:12856949 | unnamed protein product [Mus musculus]                                                                       |
| gi:12859782 | unnamed protein product [Mus musculus]                                                                       |
| gi:12860388 | unnamed protein product [Mus musculus]                                                                       |
| gi:12964610 | pre-mRNA processing 8 protein [Mus musculus]                                                                 |

|             |                                                                                                                     |
|-------------|---------------------------------------------------------------------------------------------------------------------|
| gi:13124192 | EF1D_MOUSE RecName: Full=Elongation factor 1-delta; Short=EF-1-delta                                                |
| gi:13384620 | heterogeneous nuclear ribonucleoprotein K [Mus musculus]                                                            |
| gi:13385872 | interleukin enhancer-binding factor 2 [Mus musculus]                                                                |
| gi:13386106 | cleavage and polyadenylation specificity factor subunit 5 [Mus musculus]                                            |
| gi:13435498 | Tars protein, partial [Mus musculus]                                                                                |
| gi:13435984 | Serine hydroxymethyltransferase 2 (mitochondrial) [Mus musculus]                                                    |
| gi:13442965 | AF247132_1 putative chromatin remodeling factor [Mus musculus]                                                      |
| gi:13445784 | AF340028_1 Rab6-interacting protein 2 isoform A [Mus musculus]                                                      |
| gi:13959396 | IQGA1_MOUSE RecName: Full=Ras GTPase-activating-like protein IQGAP1                                                 |
| gi:14250408 | Aspartyl-tRNA synthetase [Mus musculus]                                                                             |
| gi:15077863 | AF396878_1 bullous pemphigoid antigen 1-a [Mus musculus]                                                            |
| gi:15214281 | SF3B1_MOUSE RecName: Full=Splicing factor 3B subunit 1; AltName: Full=Pre-mRNA-splicing factor SF3b 155 kDa subunit |
| gi:15488701 | Unknown (protein for IMAGE:4219618), partial [Mus musculus]                                                         |
| gi:15723268 | AF403565_1 fructose-bisphosphate aldolase B [Mus musculus]                                                          |
| gi:16303309 | type II keratin 5 [Mus musculus]                                                                                    |
| gi:16506251 | elongation factor-like protein [Mus musculus]                                                                       |
| gi:19482166 | glycine N-acyltransferase-like protein Keg1 [Mus musculus]                                                          |
| gi:19527078 | fibrinogen gamma chain precursor [Mus musculus]                                                                     |
| gi:19527174 | splicing factor 3B subunit 3 [Mus musculus]                                                                         |
| gi:19527358 | pre-mRNA-processing factor 19 isoform 2 [Mus musculus]                                                              |
| gi:20070408 | glycine dehydrogenase [decarboxylating], mitochondrial precursor [Mus musculus]                                     |
| gi:20071242 | BC026782 protein [Mus musculus]                                                                                     |
| gi:20072624 | Heterogeneous nuclear ribonucleoprotein L [Mus musculus]                                                            |
| gi:20810027 | Acetyl-Coenzyme A acyltransferase 2 (mitochondrial 3-oxoacyl-Coenzyme A thiolase) [Mus musculus]                    |
| gi:21314854 | transcriptional repressor p66-beta [Mus musculus]                                                                   |
| gi:21704042 | cleavage stimulation factor subunit 3 isoform 1 [Mus musculus]                                                      |
| gi:22087520 | AF513713_1 memory-related protein [Mus musculus]                                                                    |
| gi:22095003 | splicing factor 3A subunit 3 [Mus musculus]                                                                         |
| gi:22122795 | cytoplasmic dynein 1 light intermediate chain 1 [Mus musculus]                                                      |
| gi:22164776 | keratin, type II cytoskeletal 79 [Mus musculus]                                                                     |

|             |                                                                                                                      |
|-------------|----------------------------------------------------------------------------------------------------------------------|
| gi:23272966 | Atp5b protein [Mus musculus]                                                                                         |
| gi:23510313 | wiskott-Aldrich syndrome protein family member 2 [Mus musculus]                                                      |
| gi:23822106 | RRBP1_MOUSE RecName: Full=Ribosome-binding protein 1; AltName: Full=Ribosome receptor protein; Short=RRp; Short=mRRp |
| gi:23956214 | splicing factor, proline- and glutamine-rich [Mus musculus]                                                          |
| gi:24657723 | Threonyl-tRNA synthetase-like 2 [Mus musculus]                                                                       |
| gi:24943086 | TPA_exp: nuclear pore complex-associated intranuclear coiled-coil protein TPR [Mus musculus]                         |
| gi:25137573 | rootletin [Mus musculus]                                                                                             |
| gi:26324430 | unnamed protein product [Mus musculus]                                                                               |
| gi:26324732 | unnamed protein product [Mus musculus]                                                                               |
| gi:26324776 | unnamed protein product [Mus musculus]                                                                               |
| gi:26327587 | unnamed protein product [Mus musculus]                                                                               |
| gi:26337387 | unnamed protein product [Mus musculus]                                                                               |
| gi:26344926 | unnamed protein product [Mus musculus]                                                                               |
| gi:26345348 | unnamed protein product [Mus musculus]                                                                               |
| gi:26345990 | unnamed protein product [Mus musculus]                                                                               |
| gi:26346400 | unnamed protein product [Mus musculus]                                                                               |
| gi:26346949 | unnamed protein product [Mus musculus]                                                                               |
| gi:26349515 | unnamed protein product [Mus musculus]                                                                               |
| gi:26350305 | unnamed protein product [Mus musculus]                                                                               |
| gi:26352267 | unnamed protein product [Mus musculus]                                                                               |
| gi:26354124 | unnamed protein product [Mus musculus]                                                                               |
| gi:26383339 | unnamed protein product [Mus musculus]                                                                               |
| gi:27369537 | glypican-2 precursor [Mus musculus]                                                                                  |
| gi:28144914 | GTPase, IMAP family member 9 [Mus musculus]                                                                          |
| gi:28972155 | mKIAA0325 protein [Mus musculus]                                                                                     |
| gi:29467640 | ankyrin repeat hooked to a zinc finger motif long form [Mus musculus]                                                |
| gi:31321923 | androgen-induced prostate proliferative shutoff associated protein AS3 [Mus musculus]                                |
| gi:31559916 | heterogeneous nuclear ribonucleoprotein A3 isoform a [Mus musculus]                                                  |
| gi:31982273 | peroxisomal multifunctional enzyme type 2 [Mus musculus]                                                             |
| gi:33563252 | fibrinogen, alpha polypeptide isoform 2 precursor [Mus musculus]                                                     |

|             |                                                                                                                     |
|-------------|---------------------------------------------------------------------------------------------------------------------|
| gi:33563288 | cell division cycle and apoptosis regulator protein 1 [Mus musculus]                                                |
| gi:36031035 | structural maintenance of chromosomes protein 3 [Mus musculus]                                                      |
| gi:37360362 | mKIAA1398 protein [Mus musculus]                                                                                    |
| gi:37360612 | mKIAA2016 protein [Mus musculus]                                                                                    |
| gi:38372875 | FINC_MOUSE RecName: Full=Fibronectin; Short=FN; Contains: RecName: Full=Anastellin; Flags: Precursor                |
| gi:38372907 | ATP-dependent RNA helicase DDX39A [Mus musculus]                                                                    |
| gi:39204553 | chromodomain-helicase-DNA-binding protein 4 [Mus musculus]                                                          |
| gi:40018610 | U5 small nuclear ribonucleoprotein 200 kDa helicase [Mus musculus]                                                  |
| gi:40068493 | probable ATP-dependent RNA helicase DDX17 isoform 1 [Mus musculus]                                                  |
| gi:40849918 | plectin 6 [Mus musculus]                                                                                            |
| gi:41946089 | Eif4g1 protein [Mus musculus]                                                                                       |
| gi:46485130 | TPA_exp: keratin Kb40 [Mus musculus]                                                                                |
| gi:47059013 | keratin, type II cytoskeletal 73 [Mus musculus]                                                                     |
| gi:49022852 | mKIAA0991 protein [Mus musculus]                                                                                    |
| gi:50401169 | PNKP_MOUSE RecName: Full=Bifunctional polynucleotide phosphatase/kinase; AltName: Full=DNA 5'-kinase/3'-phosphatase |
| gi:55740400 | leucine-rich repeat kinase 2 [Mus musculus]                                                                         |
| gi:56800176 | chromodomain helicase DNA binding protein 3 [Mus musculus]                                                          |
| gi:62738645 | A Chain A, Molecular Architecture Of Mammalian Polynucleotide Kinase, A Dna Repair Enzyme                           |
| gi:66792896 | sorting nexin-32 [Mus musculus]                                                                                     |
| gi:67846113 | U1 small nuclear ribonucleoprotein 70 kDa [Mus musculus]                                                            |
| gi:67906179 | fermitin family homolog 2 [Mus musculus]                                                                            |
| gi:68059559 | NEUA_MOUSE RecName: Full=N-acylneuraminate cytidyltransferase; AltName: Full=CMP-N-acetylneuraminic acid synthase   |
| gi:70778915 | moesin [Mus musculus]                                                                                               |
| gi:71153505 | DHX9_MOUSE RecName: Full=ATP-dependent RNA helicase A; Short=RHA; AltName: Full=DEAH box protein 9; Short=mHEL-5    |
| gi:74137669 | unnamed protein product [Mus musculus]                                                                              |
| gi:74141789 | unnamed protein product [Mus musculus]                                                                              |
| gi:74141990 | unnamed protein product [Mus musculus]                                                                              |
| gi:74143690 | unnamed protein product [Mus musculus]                                                                              |
| gi:74148166 | unnamed protein product [Mus musculus]                                                                              |
| gi:74181043 | unnamed protein product [Mus musculus]                                                                              |

|              |                                                                                |
|--------------|--------------------------------------------------------------------------------|
| gi:74181057  | unnamed protein product [Mus musculus]                                         |
| gi:74181154  | unnamed protein product [Mus musculus]                                         |
| gi:74190887  | unnamed protein product [Mus musculus]                                         |
| gi:74193982  | unnamed protein product [Mus musculus]                                         |
| gi:74198568  | unnamed protein product [Mus musculus]                                         |
| gi:74203337  | unnamed protein product [Mus musculus]                                         |
| gi:74209075  | unnamed protein product [Mus musculus]                                         |
| gi:74217870  | unnamed protein product [Mus musculus]                                         |
| gi:74219697  | unnamed protein product [Mus musculus]                                         |
| gi:74219852  | unnamed protein product [Mus musculus]                                         |
| gi:77812697  | titin isoform N2-A [Mus musculus]                                              |
| gi:77812699  | titin isoform N2-B [Mus musculus]                                              |
| gi:81867214  | GPR98_MOUSE RecName: Full=G-protein coupled receptor 98                        |
| gi:81892832  | CENPE_MOUSE RecName: Full=Centromere-associated protein E                      |
| gi:93587673  | probable ATP-dependent RNA helicase DDX17 isoform 4 [Mus musculus]             |
| gi:110625979 | elongation factor 1-gamma [Mus musculus]                                       |
| gi:112363072 | actin-related protein 2/3 complex subunit 2 [Mus musculus]                     |
| gi:116256516 | heterogeneous nuclear ribonucleoprotein D0 isoform d [Mus musculus]            |
| gi:116283440 | Rdx protein [Mus musculus]                                                     |
| gi:122114537 | vacuolar protein sorting-associated protein 13C [Mus musculus]                 |
| gi:123232325 | nebulin [Mus musculus]                                                         |
| gi:123246601 | calmodulin binding transcription activator 1 [Mus musculus]                    |
| gi:123248483 | chromodomain helicase DNA binding protein 5 [Mus musculus]                     |
| gi:124248512 | carbamoyl-phosphate synthase [ammonia], mitochondrial precursor [Mus musculus] |
| gi:134152676 | tensin-3 [Mus musculus]                                                        |
| gi:145580629 | keratin Kb40 [Mus musculus]                                                    |
| gi:145699091 | nesprin-2 [Mus musculus]                                                       |
| gi:148222065 | nebulin [Mus musculus]                                                         |
| gi:148671336 | threonyl-tRNA synthetase, isoform CRA_a [Mus musculus]                         |
| gi:148675530 | structural maintenance of chromosomes 1A, isoform CRA_b [Mus musculus]         |

|              |                                                                                                                                 |
|--------------|---------------------------------------------------------------------------------------------------------------------------------|
| gi:148685279 | RIKEN cDNA E030013G06, isoform CRA_d [Mus musculus]                                                                             |
| gi:148686927 | mCG21601 [Mus musculus]                                                                                                         |
| gi:148687563 | mCG12425, isoform CRA_a [Mus musculus]                                                                                          |
| gi:148691129 | mCG1030 [Mus musculus]                                                                                                          |
| gi:148692621 | SWI/SNF related, matrix associated, actin dependent regulator of chromatin, subfamily c, member 2, isoform CRA_a [Mus musculus] |
| gi:148693016 | mCG142052, isoform CRA_b [Mus musculus]                                                                                         |
| gi:148694957 | mCG9866 [Mus musculus]                                                                                                          |
| gi:148695270 | titin [Mus musculus]                                                                                                            |
| gi:148695542 | nucleoporin 160, isoform CRA_a [Mus musculus]                                                                                   |
| gi:148697229 | mCG119749, isoform CRA_a [Mus musculus]                                                                                         |
| gi:148697232 | mCG1035404 [Mus musculus]                                                                                                       |
| gi:148701638 | septin 8, isoform CRA_c [Mus musculus]                                                                                          |
| gi:156630942 | SPEF2_MOUSE RecName: Full=Sperm flagellar protein 2; AltName: Full=Protein KPL2                                                 |
| gi:157879307 | L Chain L, Bactericidal Antibody Against Neisseria Meningitidis                                                                 |
| gi:160358754 | TITIN_MOUSE RecName: Full=Titin; AltName: Full=Connectin                                                                        |
| gi:183980004 | heterogeneous nuclear ribonucleoprotein L [Mus musculus]                                                                        |
| gi:205277432 | E3 ubiquitin-protein ligase HECTD1 [Mus musculus]                                                                               |
| gi:226443091 | heterogeneous nuclear ribonucleoprotein A0 [Mus musculus]                                                                       |
| gi:255003678 | RING finger protein 169 [Mus musculus]                                                                                          |
| gi:258613892 | structural maintenance of chromosomes protein 1A [Mus musculus]                                                                 |
| gi:340708199 | A Chain A, Crystal Structure Of A Heterogeneous Nuclear Ribonucleoprotein L (Hnrpl) From Mus Musculus At 2.15 A Resolution      |
